# Supplementary material for: Experimental and theoretical study of the rotational reorientation dynamics of 7-animocoumarin derivatives in polar solvents: hydrogen-bonding effects
Source: Royal Society of Chemistry journal article supplement (doi:10.1039/b910043a), 2009-01-01
Supplement: b910043a.pdf [file b910043a.pdf]

**Supporting Information for**  
**Experimental and Theoretical Study of the Rotational Reorientation**  
**Dynamics of 7-Animocoumarins Derivatives in Polar Solvents:**  
**Hydrogen-Bonding Effects**

Panwang Zhou <sup>a, b</sup>, Peng Song <sup>a, b</sup>, Jianyong Liu <sup>a</sup>, Keli Han <sup>a, \*</sup>, Guozhong He <sup>a</sup>

<sup>a</sup> State Key Laboratory of Molecular Reaction Dynamics, Dalian Institute of Chemical  
Physics, Chinese Academy of Science, Dalian 116023, Liaoning, China

<sup>b</sup> Graduate School of Chinese Academy of Sciences, Beijing 100049, China

Email: [klhan@dipc.ac.cn](mailto:klhan@dipc.ac.cn)

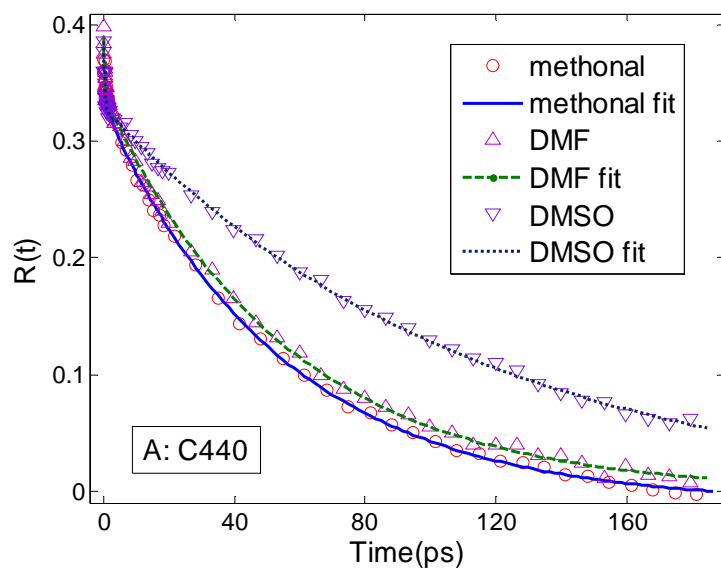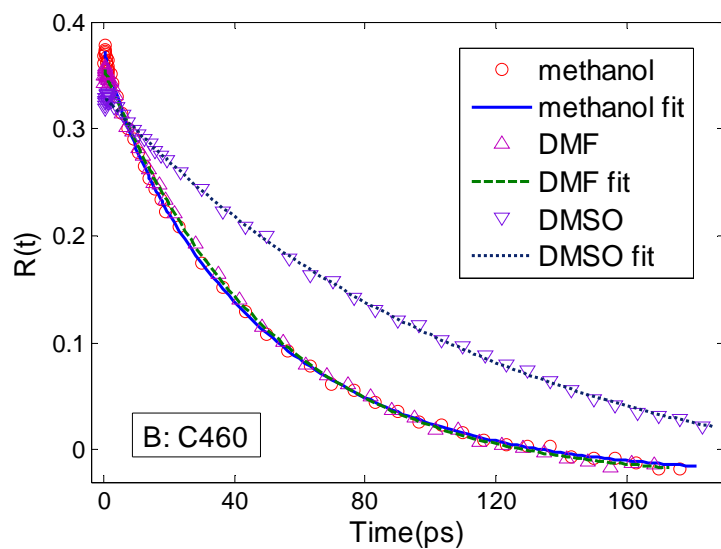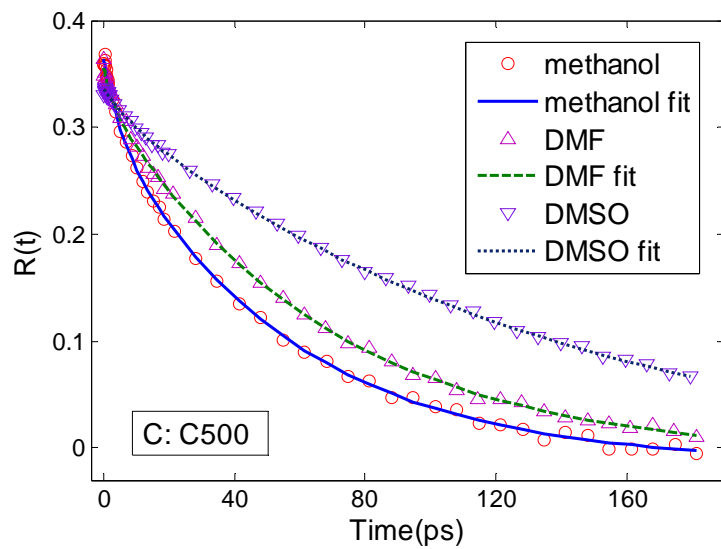

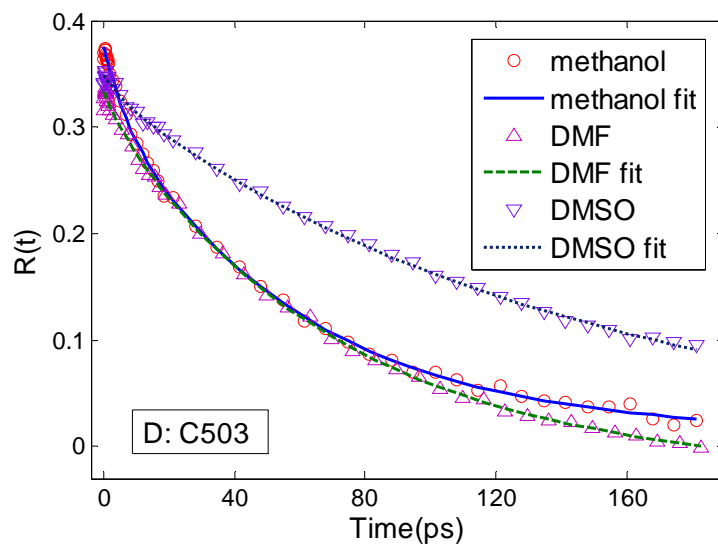

**Figure S1:** Experimental and simulated anisotropy decays of C440, C460, C500, and C503 in DMF, DMSO, and methanol.

|      | C440 | C460                    | C500                     |
|------|------|-------------------------|--------------------------|
| HOMO |      |                         |                          |
| LUMO |      |                         |                          |
|      | C503 | C440-(DMF) <sub>2</sub> | C440-(DMSO) <sub>2</sub> |
| HOMO |      |                         |                          |
| LUMO |      |                         |                          |

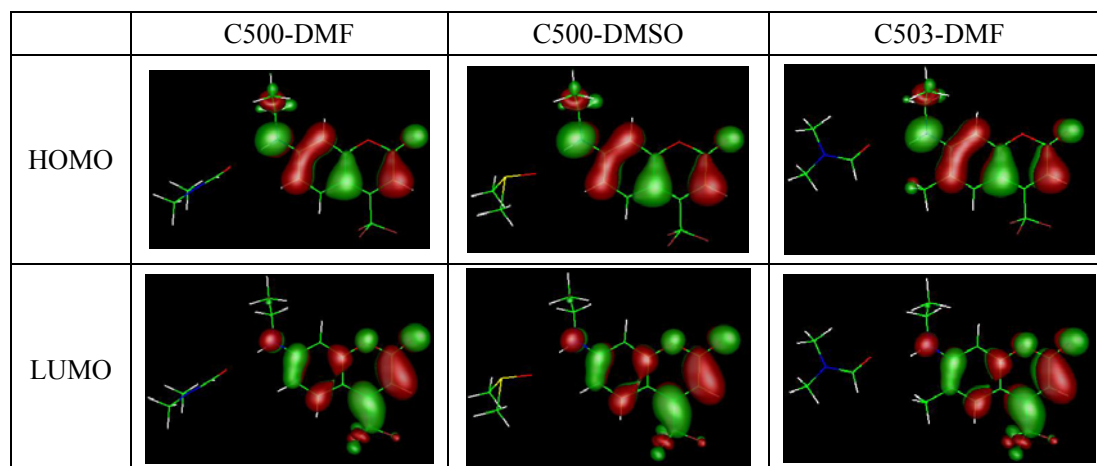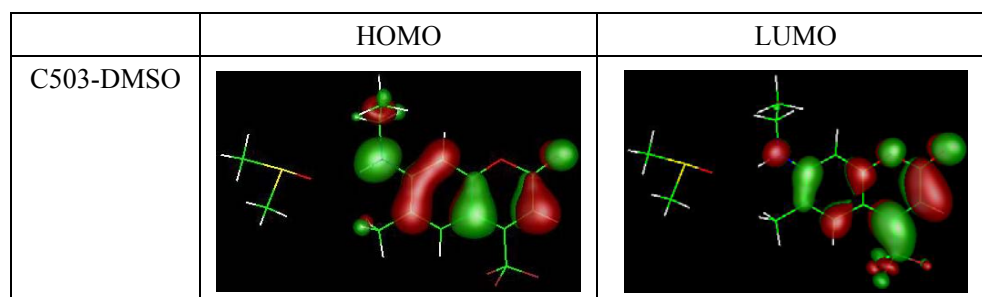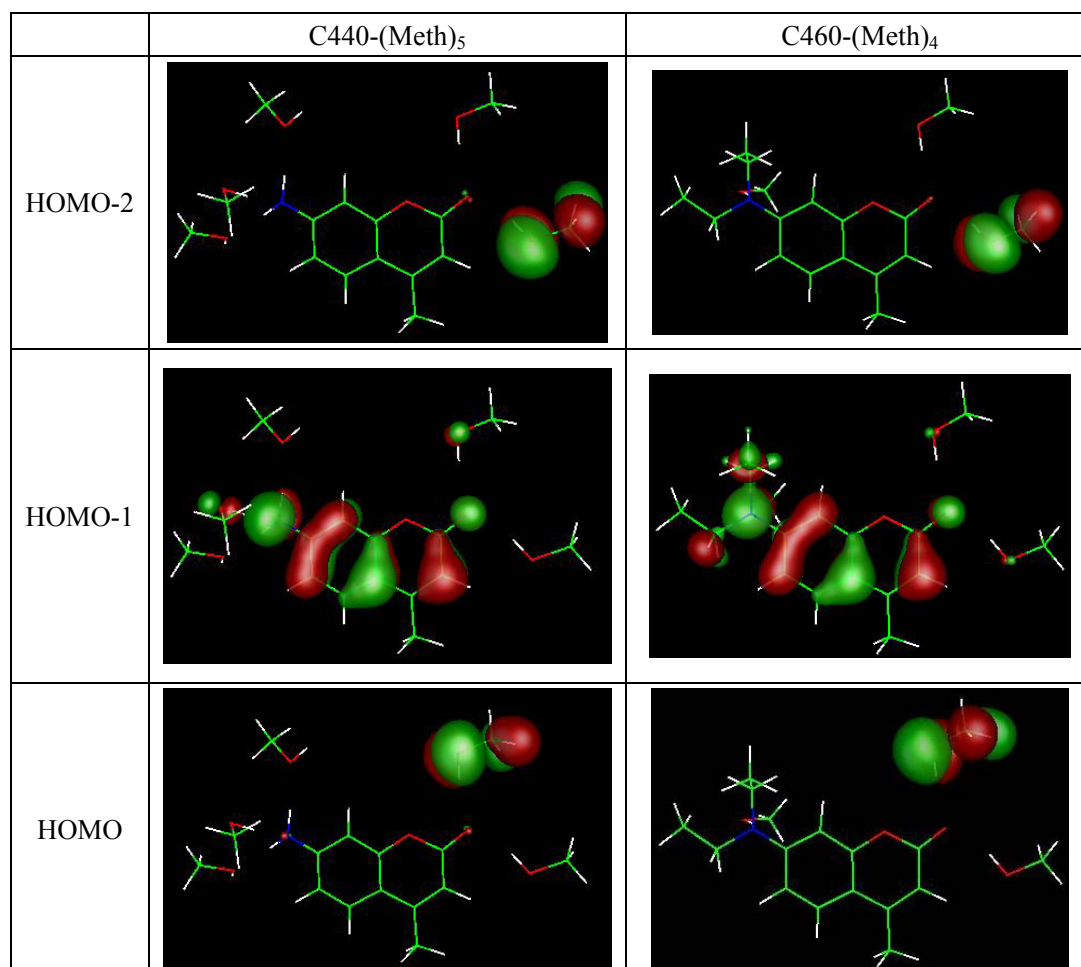

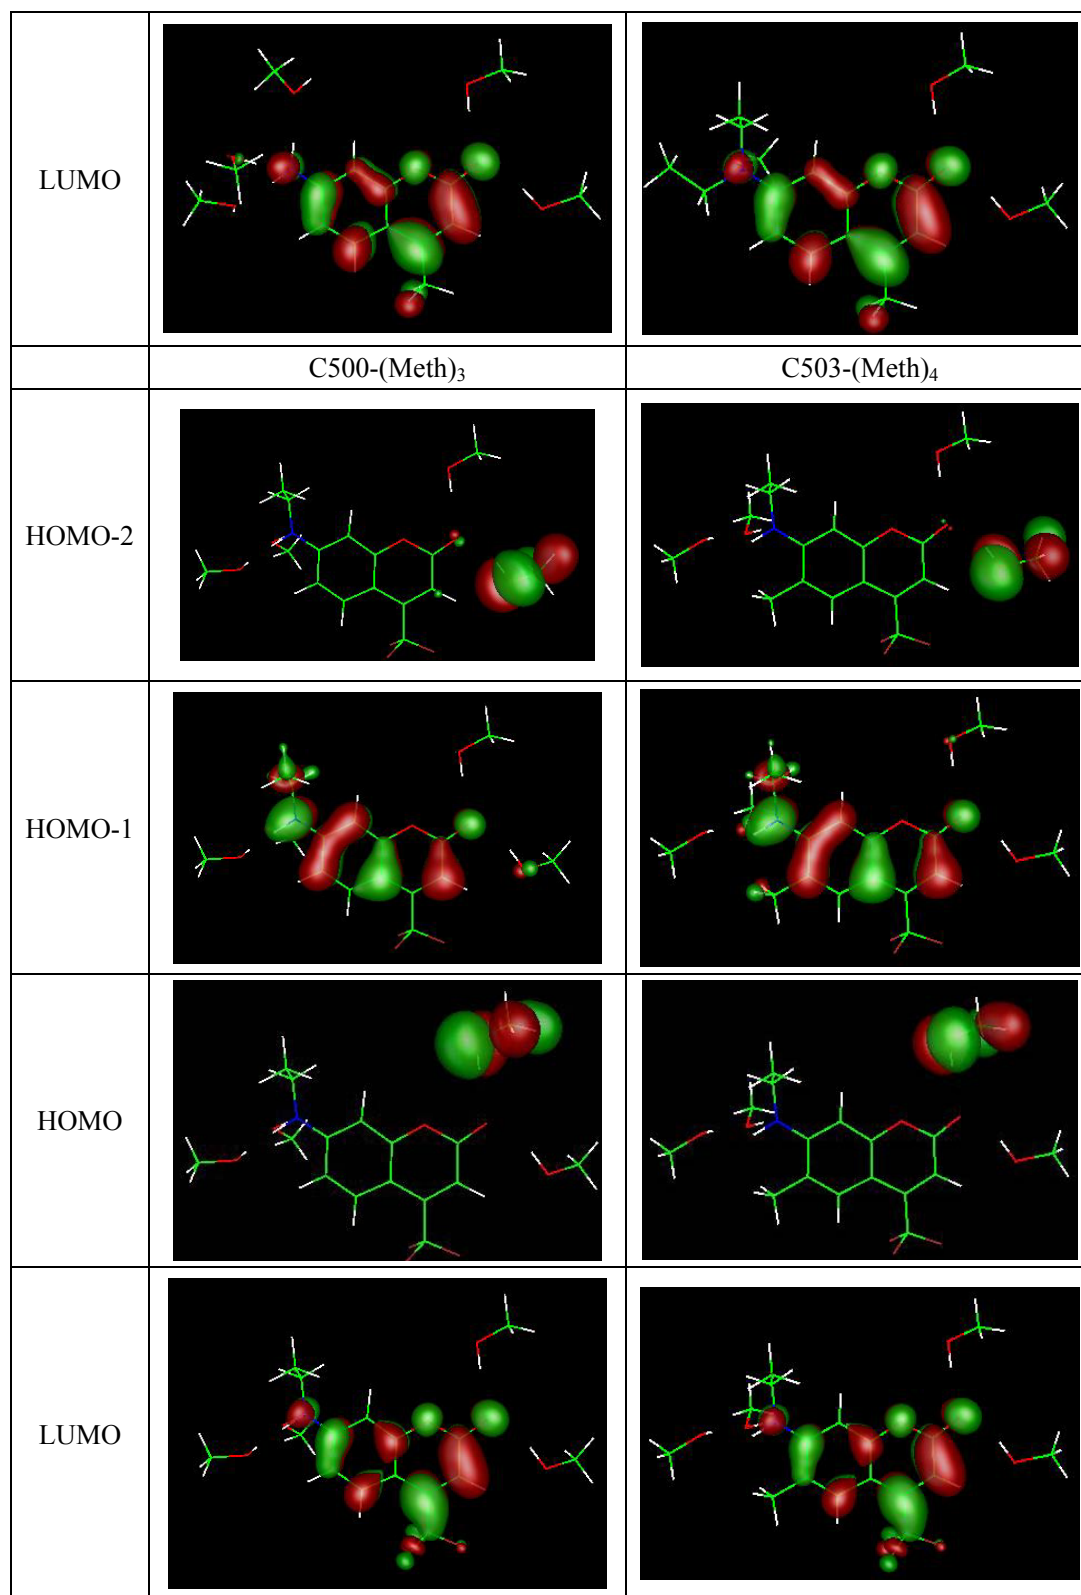

**Figure S2.** Frontier molecular orbitals (MOs) of all of the isolated coumarins and coumarin-solvent complexes under study.

**Table S1:** Calculated electronic excitation energies (eV) and corresponding oscillator strengths (in the parenthesis) of the low-lying electronically excited states for all the isolated coumarins and hydrogen-bonded coumarin-solvent complexes under study, together with dominant contributions of the orbital transitions for these electronic states (H, HOMO; L, LUMO; H-1, HOMO-1; H-2, HOMO-2).

|    | C440                    | C440-(DMF) <sub>2</sub> | C440-(DMSO) <sub>2</sub> | C460                   | C500                   |
|----|-------------------------|-------------------------|--------------------------|------------------------|------------------------|
| S1 | 3.5(0.24)<br>H→L 86.6%  | 3.2 (0.25)<br>H→L 85.9% | 3.2 (0.26)<br>H→L 88.1%  | 3.2(0.25)<br>H→L 88.3% | 3.1(0.24)<br>H→L 88.3% |
| S2 | 3.8(0.00)               | 3.3 (0.00)              | 3.6 (0.00)               | 3.8(0.04)              | 3.6(0.04)              |
| S3 | 3.9(0.02)               | 3.4 (0.00)              | 3.7 (0.00)               | 3.8(0.00)              | 3.7(0.00)              |
| S4 | 4.4(0.04)               | 3.9(0.04)               | 3.8(0.00)                | 4.2(0.08)              | 4.2(0.02)              |
| S5 | 4.8(0.04)               | 3.9(0.00)               | 3.9(0.04)                | 4.6(0.09)              | 4.5(0.08)              |
|    | C500-DMF                | C500-DMSO               | C503                     | C503-DMF               | C503-DMSO              |
| S1 | 2.9 (0.26)<br>H→L 89.3% | 2.9 (0.26)<br>H→L 89.4% | 3.1(0.25)<br>H→L 88.9%   | 2.9(0.28)<br>H→L 89.4% | 2.9(0.28)<br>H→L 89.6% |
| S2 | 3.4(0.00)               | 3.6(0.04)               | 3.5(0.03)                | 3.4(0.00)              | 3.4(0.03)              |
| S3 | 3.6(0.05)               | 3.7(0.00)               | 3.6 (0.00)               | 3.5(0.03)              | 3.7(0.00)              |
| S4 | 3.7(0.00)               | 3.7(0.00)               | 4.2(0.03)                | 3.7(0.00)              | 3.7(0.00)              |
| S5 | 4.1(0.02)               | 3.8(0.00)               | 4.5(0.07)                | 4.1(0.00)              | 3.8(0.00)              |

|    | C440-(Meth) <sub>5</sub> | C460-(Meth) <sub>3</sub> | C500-(Meth) <sub>4</sub> | C503-(Meth) <sub>4</sub>  |
|----|--------------------------|--------------------------|--------------------------|---------------------------|
| S1 | 2.5(0.00)<br>H→L 98.9%   | 2.4(0.00)<br>H→L 99.7%   | 2.1(0.00)<br>H→L 99.9%   | 2.1(0.00)<br>H→L 99.8%    |
| S2 | 2.9(0.00)<br>H-2→L 99.9% | 2.7(0.00)<br>H-2→L 99.3% | 2.4(0.00)<br>H-2→L 98.9% | 2.4(0.00)<br>H-2→L 100.0% |
| S3 | 3.3(0.28)<br>H-1→L 87.2% | 3.1(0.25)<br>H-1→L 88.2% | 3.0(0.27)<br>H-1→L 88.7% | 3.0(0.29)<br>H-1→L 89.6%  |
| S4 | 3.4(0.00)                | 3.2(0.00)                | 3.4(0.00)                | 3.3(0.00)                 |
| S5 | 3.8(0.00)                | 3.7(0.00)                | 3.6(0.00)                | 3.4(0.03)                 |

**Table S2:** Calculated torsions between amino group and the coumarin ring plane for all the isolated coumarins and hydrogen-bonded coumarin-solvent complexes under study (for definition of  $\alpha$  and  $\beta$ , see Figure 3).

|   | C440      |      | C440-(DMF) <sub>2</sub>  |       | C440-(DMSO) <sub>2</sub> |       | C440-(Meth) <sub>5</sub> |      |
|---|-----------|------|--------------------------|-------|--------------------------|-------|--------------------------|------|
|   | S0        | S1   | S0                       | S1    | S0                       | S1    | S0                       | S3   |
| α | -19.9     | 1.5  | -11.9                    | -6.8  | 3.6                      | -5.4  | 19.7                     | 11.3 |
| β | 21.6      | -1.0 | 7.1                      | -3.1  | 1.2                      | 13.6  | -23.4                    | 11.9 |
|   | C460      |      | C460-(Meth) <sub>2</sub> |       | C500                     |       | C500-DMF                 |      |
|   | S0        | S1   | S0                       | S3    | S0                       | S1    | S0                       | S1   |
| α | -15.3     | 91.3 | -15.6                    | -96.4 | -8.7                     | -11.5 | -1.5                     | -0.0 |
| β | 6.2       | 88.1 | 5.4                      | -81.9 | 8.9                      | 3.3   | 5.7                      | 7.1  |
|   | C500-DMSO |      | C500-(Meth) <sub>4</sub> |       | C503                     |       | C503-DMF                 |      |
|   | S0        | S1   | S0                       | S3    | S0                       | S1    | S0                       | S1   |
| α | -0.8      | 11.3 | -18.9                    | -19.0 | -7.7                     | -8.0  | -3.5                     | -5.0 |
| β | 3.2       | 17.3 | 16.4                     | -12.5 | 9.7                      | 5.3   | 3.8                      | 3.1  |
|   | C503-DMSO |      | C503-(Meth) <sub>3</sub> |       | C460-(Meth) <sub>3</sub> |       | C503-(Meth) <sub>4</sub> |      |
|   | S0        | S1   | S0                       | S3    | S0                       | S3    | S0                       | S3   |
| α | -4.8      | -2.1 | -2.2                     | -8.0  | -21.2                    | -     | -19.2                    | -    |
| β | 7.0       | 7.6  | -4.9                     | -6.2  | 11.9                     | -     | 18.2                     | -    |

**Table S3:** All the optimized geometric coordinates of isolated coumarins and hydrogen-bonded coumarin-solvent complexes involved here (see the following 8 pages).

|                          |                          |            |              |            |                          |                          |            |            |
|--------------------------|--------------------------|------------|--------------|------------|--------------------------|--------------------------|------------|------------|
| C440/S0                  | O                        | 3.9331577  | 2.2559653    | -0.2427014 | C500/S0                  |                          |            |            |
| Energy = -591.9414541561 | C                        | 3.3397456  | -2.5592431   | 0.3258456  | Energy = -968.4507864100 |                          |            |            |
| C -2.5966833             | 0.3708770                | 0.0058240  | N -2.7429406 | 0.0474095  | -0.2733861               | C -2.4812637             | -0.8147493 | -0.2488719 |
| C -2.4287335             | -1.0367303               | 0.0062574  | C -3.1828861 | 1.4425550  | -0.1653228               | C -1.5259076             | -1.8685798 | -0.1652541 |
| C -1.1603438             | -1.5906989               | 0.0095654  | C -3.7372121 | -1.0184665 | -0.0647201               | C -0.1762350             | -1.6021610 | -0.0817666 |
| C 0.0028130              | -0.7884483               | 0.0013360  | C -3.2406315 | 1.9782747  | 1.2713405                | C 0.3162644              | -0.2724239 | -0.0679496 |
| C -0.1868291             | 0.6164527                | -0.0005525 | C -5.1497855 | -0.6829241 | -0.5393429               | C -0.6480440             | 0.7660765  | -0.1479942 |
| C -1.4569488             | 1.1902905                | 0.0018114  | H -1.6693620 | -2.4096518 | 0.1824031                | C -2.0148718             | 0.5128390  | -0.2293180 |
| C 1.3543460              | -1.2976692               | -0.0018514 | H 0.6864082  | -2.9431293 | 0.3150785                | C 1.6947272              | 0.1254911  | 0.0171923  |
| C 2.3953829              | -0.4103054               | -0.0068261 | H -0.6405736 | 1.7941132  | -0.3425475               | C 2.0513691              | 1.4440957  | 0.0242318  |
| C 2.2176657              | 1.0256436                | 0.0001260  | H 4.7576225  | -0.2352410 | 0.0889299                | C 1.0673391              | 2.5051266  | -0.0528140 |
| O 0.8704626              | 1.4838267                | 0.0021425  | H 4.4358159  | -2.5671290 | 0.3648694                | O -0.2849694             | 2.0865903  | -0.1379450 |
| O 3.0853035              | 1.8745056                | 0.0040143  | H 3.0197752  | -3.2167115 | -0.4971734               | O 1.2809016              | 3.6987060  | -0.0512420 |
| C 1.6079044              | -2.7804974               | -0.0038733 | H 2.9592901  | -3.0018075 | 1.2595365                | C 2.7833074              | -0.9301768 | 0.1014661  |
| N -3.8661202             | 0.9226571                | -0.0496879 | H -4.1705311 | 1.5199636  | -0.6349739               | F 2.7675131              | -1.7527146 | -0.9887183 |
| H -3.3084347             | -1.6833258               | 0.0050168  | H -2.5202200 | 2.0646368  | -0.7818203               | F 2.6260862              | -1.7240667 | 1.2015302  |
| H -1.0578768             | -2.6764875               | 0.0127312  | H -3.7684109 | -1.3210875 | 1.0007181                | F 4.0265819              | -0.3937371 | 0.1749609  |
| H -1.5397911             | 2.2780721                | 0.0012407  | H -3.3978222 | -1.8971127 | -0.6313187               | N -3.8111899             | -1.1268459 | -0.3753591 |
| H 3.4313949              | -0.7483612               | -0.0115274 | H -2.2571098 | 1.9197478  | 1.7573112                | C -4.9115737             | -0.1700727 | -0.3246177 |
| H 2.6835735              | -2.9941381               | -0.0073610 | H -3.9558813 | 1.4065504  | 1.8803777                | C -5.2867374             | 0.2901671  | 1.0899654  |
| H 1.1596319              | -3.2582398               | -0.8888753 | H -3.5607741 | 3.0306826  | 1.2736932                | H -1.8725296             | -2.9041029 | -0.1784138 |
| H 1.1648812              | -3.2600677               | 0.8823252  | H -5.7702668 | -1.5857979 | -0.4485968               | H 0.5217435              | -2.4355493 | -0.0205379 |
| H -3.9631856             | 1.8977501                | 0.2140710  | H -5.1591023 | -0.3754093 | -1.5947615               | H -2.6894533             | 1.3652706  | -0.2812612 |
| H -4.6401939             | 0.3361272                | 0.2443018  | H -5.6302915 | 0.1020152  | 0.0601258                | H 3.0888894              | 1.7621595  | 0.0882008  |
| C440/S1                  | C460/S1                  |            |              |            |                          | H -4.0516362             | -2.1061994 | -0.2609106 |
| Energy = -591.9197070409 | Energy = -749.1951219120 |            |              |            |                          | H -5.7755827             | -0.6479072 | -0.8089934 |
| C -2.6646955             | 0.3323962                | -0.0007803 | C -1.3281358 | -0.1499956 | -0.0368088               | H -4.6497710             | 0.6937352  | -0.9545320 |
| C -2.4898991             | -1.0456726               | -0.0010630 | C -0.9882349 | -1.4771947 | -0.2454611               | H -4.4356776             | 0.7695694  | 1.5924473  |
| C -1.1698828             | -1.5521827               | 0.0000262  | C 0.3745901  | -1.8120002 | -0.3012844               | H -5.6113090             | -0.5603717 | 1.7064523  |
| C 0.0010506              | -0.7746681               | -0.0001130 | C 1.4021893  | -0.8498921 | -0.1472019               | H -6.1120894             | 1.0160341  | 1.0492299  |
| C -0.1652651             | 0.6191590                | 0.0001852  | C 0.9947787  | 0.5043142  | 0.0652582                | C500/S1                  |            |            |
| C -1.5054034             | 1.1760728                | -0.0004410 | C -0.3578945 | 0.8500674  | 0.1203513                | Energy = -968.4382418598 |            |            |
| C 1.3789542              | -1.3223850               | 0.0003606  | C 2.8093296  | -1.1434416 | -0.1938132               | C -2.4857560             | -0.8253095 | -0.2886849 |
| C 2.4484390              | -0.4222517               | -0.0001836 | C 3.7192292  | -0.0799566 | -0.0206699               | C -1.5566253             | -1.8776873 | -0.2173646 |
| C 2.3847257              | 0.9744271                | -0.0000074 | C 3.3578063  | 1.2640075  | 0.1919083                | C -0.1965680             | -1.5805595 | -0.1273627 |
| O 0.8052634              | 1.4987805                | 0.0003741  | O 1.8794630  | 1.5197622  | 0.2241349                | C 0.3039235              | -0.2639879 | -0.0962914 |
| O 3.1437889              | 1.9125088                | -0.0002618 | O 4.0287921  | 2.2722081  | 0.3573434                | C -0.6177240             | 0.7752348  | -0.1621327 |
| C 1.5847867              | -2.7988846               | 0.0002792  | C 3.2843890  | -2.5484196 | -0.4184630               | C -2.0232513             | 0.5050142  | -0.2666712 |
| N -3.8878118             | 0.9608495                | 0.0031749  | N -2.7393731 | 0.2644062  | -0.0022214               | C 1.7598184              | 0.1203690  | 0.0101727  |
| H -3.3425984             | -1.7236474               | -0.0010430 | C -3.4627108 | 0.2204561  | 1.2573887                | C 2.0544902              | 1.4698902  | 0.0263261  |
| H -1.0556683             | -2.6382602               | -0.0000241 | C -3.3736585 | 0.6057086  | -1.2659699               | C 1.0969989              | 2.5257788  | -0.0509078 |
| H -1.5981825             | 2.2635684                | 0.0010535  | C -4.0563080 | -1.1780113 | 1.5267394                | O -0.3185834             | 2.0862049  | -0.1442021 |
| H 3.4704778              | -0.8087219               | -0.0003065 | C -4.7346217 | 1.2835333  | -1.2005949               | O 1.2621317              | 3.7336294  | -0.0478292 |
| H 2.6553399              | -3.0439778               | 0.0006011  | H -1.7464421 | -2.2479957 | -0.3884983               | C 2.7989329              | -0.9095449 | 0.1143405  |
| H 1.1342128              | -3.2909523               | -0.8850104 | H 0.6471273  | -2.8527922 | -0.4745409               | F 2.8035335              | -1.7934998 | -0.9660428 |
| H 1.1336817              | -3.2911057               | 0.8852036  | H -0.6185804 | 1.8956395  | 0.2876782                | F 2.6289689              | -1.7493806 | 1.2171082  |
| H -3.9560723             | 1.9713939                | -0.0168469 | H 4.7927240  | -0.2688335 | -0.0468455               | F 4.0543228              | -0.4005600 | 0.2045245  |
| H -4.7494928             | 0.4271149                | -0.0088263 | H 4.3820513  | -2.5879421 | -0.4270103               | N -3.8526933             | -1.0879700 | -0.4056349 |
| C460/S0                  | H 2.9329987              | -2.9647424 | -1.3810282   |            |                          | C -4.9354004             | -0.1291025 | -0.2826483 |
| Energy = -749.2256214687 | H 2.9365544              | -3.2433843 | 0.3684729    |            |                          | C -5.3031059             | 0.2055154  | 1.1761755  |
| C -1.3962287             | -0.2588295               | -0.1350899 | H -4.2592521 | 0.9743004  | 1.2390322                | H -1.8930801             | -2.9151332 | -0.2329141 |
| C -0.9526811             | -1.5999169               | 0.0728039  | H -2.7367375 | 0.4745617  | 2.0379673                | H 0.5092048              | -2.4087359 | -0.0723725 |
| C 0.3960043              | -1.9036988               | 0.1556147  | H -3.4234916 | -0.3440302 | -1.8315887               | H -2.6896428             | 1.3626744  | -0.3407274 |
| C 1.3987421              | -0.9166127               | 0.0551319  | H -2.6335988 | 1.2104583  | -1.8110265               | H 3.0879453              | 1.8064488  | 0.1039862  |
| C 0.9495806              | 0.4144277                | -0.1262107 | H -3.2646275 | -1.9333143 | 1.5772295                | H -4.1090570             | -2.0729974 | -0.3811676 |
| C -0.3996952             | 0.7422708                | -0.2110223 | H -4.7807336 | -1.4632564 | 0.7526664                | H -5.8053682             | -0.5589153 | -0.7996941 |
| C 2.8182296              | -1.1608976               | 0.1365288  | H -4.5747410 | -1.1485178 | 2.4920153                | H -4.6616608             | 0.7874485  | -0.8241343 |
| C 3.6775677              | -0.1004693               | 0.0351528  | H -5.0694999 | 1.4854457  | -2.2263134               | H -4.4470470             | 0.6479297  | 1.7024751  |
| C 3.2363137              | 1.2654216                | -0.1472612 | H -4.6865702 | 2.2469422  | -0.6755962               | H -5.6203436             | -0.6941632 | 1.7207484  |
| O 1.8304060              | 1.4603432                | -0.2208978 | H -5.4988260 | 0.6555342  | -0.7240816               | H -6.1322840             | 0.9268658  | 1.1882855  |



|                          |            |            |            |                             |            |            |            |                              |            |            |            |           |
|--------------------------|------------|------------|------------|-----------------------------|------------|------------|------------|------------------------------|------------|------------|------------|-----------|
| C503/S0                  | H          | -4.2473131 | 1.2383344  | 1.6775045                   | C          | 0.9907888  | -0.0318414 | -0.1370308                   |            |            |            |           |
| Energy = -1007.780629991 | H          | -5.5229401 | -0.0036250 | 1.7631240                   | C          | 3.1609984  | -3.1501687 | 0.1476608                    |            |            |            |           |
| C                        | -2.4128888 | -0.4786276 | -0.2187858 | H                           | -5.9065842 | 1.6235396  | 1.1480374  | C                            | 4.3614167  | -2.5365834 | -0.1572368 |           |
| C                        | -1.5450529 | -1.6192355 | -0.1308959 | H                           | -2.7102210 | -3.2302974 | -1.1232239 | C                            | 4.5534555  | -1.1599471 | -0.4613003 |           |
| C                        | -0.1785982 | -1.4170968 | -0.0550324 | H                           | -2.8124122 | -3.2130785 | 0.6568370  | O                            | 3.2816587  | -0.3424464 | -0.4592569 |           |
| C                        | 0.4089700  | -0.1275877 | -0.0579721 | H                           | -1.3365568 | -3.7593630 | -0.1448503 | O                            | 5.5624430  | -0.5151958 | -0.7260513 |           |
| C                        | -0.4744544 | 0.9769178  | -0.1473372 | C440-(DMF) <sub>2</sub> /S0 |            |            |            | C                            | 3.0200607  | -4.5971441 | 0.4551032  |           |
| C                        | -1.8533317 | 0.8122153  | -0.2197333 | Energy = -1089.194146589    |            |            |            | N                            | -1.3271270 | 0.4204175  | 0.1964257  |           |
| C                        | 1.8132991  | 0.1698587  | 0.0179585  | C                           | -0.2180613 | -0.5115540 | 0.0798091  | H                            | -1.4608309 | -2.2338947 | 0.8124542  |           |
| C                        | 2.2636464  | 1.4598759  | 0.0098450  | C                           | -0.2933449 | -1.8672812 | 0.5170231  | H                            | 0.5032405  | -3.7514129 | 0.7649331  |           |
| C                        | 1.3591224  | 2.5887708  | -0.0781830 | C                           | 0.8411853  | -2.6530619 | 0.5755721  | H                            | 1.1472810  | 1.0085074  | -0.4207041 |           |
| O                        | -0.0189959 | 2.2693648  | -0.1550587 | C                           | 2.1177427  | -2.1590246 | 0.2104485  | H                            | 5.2814030  | -3.1258725 | -0.1789829 |           |
| O                        | 1.6607780  | 3.7637249  | -0.0924930 | C                           | 2.1748705  | -0.8091133 | -0.2269757 | H                            | 3.9881589  | -5.1115116 | 0.3833709  |           |
| C                        | 2.8239826  | -0.9593531 | 0.1128634  | C                           | 1.0443862  | -0.0048881 | -0.3007287 | H                            | 2.3154205  | -5.1078845 | -0.2341546 |           |
| F                        | 2.7464276  | -1.7927680 | -0.9667821 | C                           | 3.3399148  | -2.9155740 | 0.2523718  | H                            | 2.6198304  | -4.7768281 | 1.4752742  |           |
| F                        | 2.6154411  | -1.7271269 | 1.2233488  | C                           | 4.5134411  | -2.3126247 | -0.1242095 | H                            | -1.1149715 | 1.4195283  | 0.0442257  |           |
| F                        | 4.1029690  | -0.5126938 | 0.1763912  | C                           | 4.5910501  | -0.9399686 | -0.5639676 | H                            | -2.2999425 | 0.1296167  | 0.3835965  |           |
| N                        | -3.7666835 | -0.6784279 | -0.3341955 | O                           | 3.3618364  | -0.2292599 | -0.6002059 | C                            | 0.3597533  | 3.7423662  | 0.4735771  |           |
| C                        | -4.7795487 | 0.3718257  | -0.3089931 | O                           | 5.5869201  | -0.3273819 | -0.9037865 | H                            | 0.8544305  | 3.2552659  | 1.3400954  |           |
| C                        | -5.1061654 | 0.9045659  | 1.0922224  | C                           | 3.3319658  | -4.3519607 | 0.7038200  | O                            | -0.5544070 | 3.1964827  | -0.1595606 |           |
| C                        | -2.1213858 | -3.0114998 | -0.1329607 | N                           | -1.3364623 | 0.2635840  | 0.0143204  | N                            | 0.8701670  | 4.9681507  | 0.2059174  |           |
| H                        | 0.4664870  | -2.2929589 | 0.0102558  | H                           | -1.2622172 | -2.2710975 | 0.8153215  | C                            | 0.3592340  | 5.7593765  | -0.9074110 |           |
| H                        | -2.4705566 | 1.7067602  | -0.2766414 | H                           | 0.7511770  | -3.6848909 | 0.9192534  | H                            | -0.0168228 | 6.7285891  | -0.5456773 |           |
| H                        | 3.3216930  | 1.7027046  | 0.0669231  | H                           | 1.1450780  | 1.0163963  | -0.6678309 | H                            | 1.1563580  | 5.9417436  | -1.6444991 |           |
| H                        | -4.0947817 | -1.6284116 | -0.1991929 | H                           | 5.4608873  | -2.8506345 | -0.1053287 | H                            | -0.4558140 | 5.2010158  | -1.3800556 |           |
| H                        | -5.6844865 | -0.0445694 | -0.7751067 | H                           | 4.3430622  | -4.7766607 | 0.6771757  | C                            | 1.9716711  | 5.5201908  | 0.9835568  |           |
| H                        | -4.4486446 | 1.1908444  | -0.9655934 | H                           | 2.6833312  | -4.9666898 | 0.0606380  | H                            | 2.2533472  | 4.8127968  | 1.7737528  |           |
| H                        | -4.2142914 | 1.3223702  | 1.5786764  | H                           | 2.9470988  | -4.4435555 | 1.7313982  | H                            | 2.8494016  | 5.6959951  | 0.3427048  |           |
| H                        | -5.5010238 | 0.1039960  | 1.7340752  | H                           | -1.2431303 | 1.2728958  | -0.1372354 | H                            | 1.6784230  | 6.4736593  | 1.4496550  |           |
| H                        | -5.8652240 | 1.6983135  | 1.0316600  | H                           | -2.2240847 | -0.0910568 | 0.3826557  | C                            | -4.7962939 | -0.7361138 | -0.3993254 |           |
| H                        | -2.6932413 | -3.2185348 | -1.0535118 | C                           | 0.0956219  | 3.6906116  | 0.3894743  | H                            | -4.4302390 | -0.7310199 | -1.4480312 |           |
| H                        | -2.7979372 | -3.1820905 | 0.7227393  | H                           | 0.6944724  | 3.0865702  | 1.1042859  | O                            | -4.0791354 | -0.4092007 | 0.5537623  |           |
| H                        | -1.3239359 | -3.7618194 | -0.0671838 | O                           | -0.8406399 | 3.2122099  | -0.2588145 | N                            | -6.0893448 | -1.1345707 | -0.3014680 |           |
| C503/S1                  | N          | 0.5174704  | 4.9810343  | 0.3232548                   | C          | -0.1372933 | 5.9290353  | -0.5685572                   | C          | -6.7468789 | -1.2081202 | 0.9981790 |
| Energy = -1007.768348073 | C          | -0.1372933 | 5.9290353  | -0.5685572                  | H          | -0.5374680 | 6.7809827  | 0.0029890                    | H          | -7.6242722 | -0.5435933 | 1.0214255 |
| C                        | -2.4159515 | -0.4877299 | -0.2458540 | H                           | 0.5758137  | 6.3096710  | -1.3165296 | H                            | -7.0779348 | -2.2380201 | 1.2022667  |           |
| C                        | -1.5728581 | -1.6221241 | -0.1826066 | H                           | -0.9571925 | 5.4090977  | -1.0762152 | H                            | -6.0288546 | -0.8952497 | 1.7638157  |           |
| C                        | -0.1957145 | -1.3941159 | -0.1047258 | C                           | 1.6507515  | 5.4518730  | 1.1057645  | C                            | -6.8622614 | -1.5080549 | -1.4774362 |           |
| C                        | 0.3995361  | -0.1159474 | -0.0823290 | H                           | 2.0421195  | 4.6270036  | 1.7149203  | H                            | -6.2379989 | -1.4041811 | -2.3742721 |           |
| C                        | -0.4422133 | 0.9857703  | -0.1451417 | H                           | 2.4568806  | 5.8130612  | 0.4478273  | H                            | -7.2022864 | -2.5530233 | -1.4049919 |           |
| C                        | -1.8612275 | 0.8076830  | -0.2351331 | H                           | 1.3498381  | 6.2732973  | 1.7752534  | H                            | -7.7453537 | -0.8591399 | -1.5860347 |           |
| C                        | 1.8797339  | 0.1601930  | 0.0111231  | C                           | -4.7291859 | -0.9245502 | -0.2934651 | C440-(DMSO) <sub>2</sub> /S0 |            |            |            |           |
| C                        | 2.2717675  | 1.4856531  | -0.0072866 | H                           | -4.3500558 | -0.6617278 | -1.3047903 | Energy = -1698.600595732     |            |            |            |           |
| C                        | 1.3919593  | 2.6070671  | -0.0950390 | O                           | -4.0297407 | -0.8273404 | 0.7188155  | C                            | 0.2157155  | -0.8673079 | -0.2630775 |           |
| O                        | -0.0505761 | 2.2747795  | -0.1454190 | O                           | -6.0201594 | -1.3521535 | -0.3172570 | C                            | 0.7935117  | -2.1157227 | -0.6404757 |           |
| O                        | 1.6497170  | 3.7987725  | -0.1276673 | N                           | -6.6927960 | -1.7423020 | 0.9151898  | C                            | 2.1635877  | -2.2911554 | -0.6207512 |           |
| C                        | 2.8414146  | -0.9392089 | 0.1346419  | H                           | -7.5799896 | -1.1125622 | 1.0854100  | C                            | 3.0514369  | -1.2562053 | -0.2349771 |           |
| F                        | 2.7825660  | -1.8431327 | -0.9296048 | H                           | -7.0121748 | -2.7949685 | 0.8632343  | C                            | 2.4611198  | -0.0213055 | 0.1420560  |           |
| F                        | 2.6127718  | -1.7463939 | 1.2522628  | H                           | -5.9875699 | -1.6136973 | 1.7436965  | C                            | 1.0856804  | 0.1726260  | 0.1349193  |           |
| F                        | 4.1304767  | -0.5213123 | 0.2156244  | C                           | -6.7712153 | -1.4371125 | -1.5602648 | C                            | 4.4849072  | -1.3670418 | -0.1941814 |           |
| N                        | -3.7994155 | -0.6464328 | -0.3371949 | H                           | -6.1353863 | -1.1118015 | -2.3938967 | C                            | 5.2289670  | -0.2836067 | 0.2002355  |           |
| C                        | -4.8022753 | 0.4013374  | -0.2653666 | H                           | -7.0983772 | -2.4716647 | -1.7510718 | C                            | 4.6462526  | 0.9806556  | 0.5809482  |           |
| C                        | -5.1372486 | 0.8390158  | 1.1732975  | H                           | -7.6623412 | -0.7902571 | -1.5248429 | O                            | 3.2258221  | 1.0484070  | 0.5336575  |           |
| C                        | -2.1427728 | -3.0177081 | -0.2000550 | C440-(DMF) <sub>2</sub> /S1 |            |            |            | O                            | 5.2279665  | 1.9894013  | 0.9347763  |           |
| H                        | 0.4573850  | -2.2660379 | -0.0551707 | C                           | -0.3018436 | -0.5000338 | 0.2099456  | C                            | 5.1602665  | -2.6560766 | -0.5792403 |           |
| H                        | -2.4715629 | 1.7067018  | -0.3026947 | C                           | -0.4777514 | -1.8568683 | 0.5338356  | N                            | -1.1296664 | -0.6795943 | -0.2875050 |           |
| H                        | 3.3277861  | 1.7479845  | 0.0501380  | C                           | 0.6436148  | -2.6995597 | 0.5082659  | H                            | 0.1357906  | -2.9302336 | -0.9478637 |           |
| H                        | -4.1337047 | -1.6053593 | -0.2678554 | C                           | 1.9447832  | -2.2666151 | 0.1779987  | H                            | 2.5744799  | -3.2577830 | -0.9165990 |           |
| H                        | -5.7056029 | 0.0148497  | -0.7589337 | C                           | 2.1143703  | -0.9175711 | -0.1414769 | H                            | 0.6872530  | 1.1327834  | 0.4636714  |           |
| H                        | -4.4591157 | 1.2631960  | -0.8550375 |                             |            |            |            | H                            | 6.3168830  | -0.3270118 | 0.2435659  |           |

|                          |            |            |            |                          |            |            |            |                          |            |            |            |
|--------------------------|------------|------------|------------|--------------------------|------------|------------|------------|--------------------------|------------|------------|------------|
| H                        | 6.2503463  | -2.5685322 | -0.4932386 | H                        | -5.5142082 | -0.4204422 | -1.1637225 | H                        | 7.9678910  | -0.3178417 | -0.2041220 |
| H                        | 4.9181849  | -2.9371242 | -1.6159063 | H                        | -5.9436989 | -0.0047121 | 0.5280810  | O                        | 6.2722770  | -1.5361835 | 0.1079973  |
| H                        | 4.8297010  | -3.4854014 | 0.0651110  | H                        | -4.2700380 | 0.3287198  | -0.0875533 | H                        | 5.6383462  | -0.7839930 | 0.0748478  |
| H                        | -1.5295977 | 0.2377498  | -0.0694363 | C                        | -3.8977943 | -1.6096420 | 1.9857670  | C440-(Meth)5/S1          |            |            |            |
| H                        | -1.7861536 | -1.4227842 | -0.5568756 | H                        | -4.6884636 | -1.2520821 | 2.6584660  | Energy = -1170.846783835 |            |            |            |
| C                        | -1.3252190 | 3.1053269  | -1.8254606 | H                        | -3.4524108 | -2.5285644 | 2.3834193  | C                        | -1.7441757 | -0.5807952 | -0.6753396 |
| H                        | -1.8539234 | 2.4901572  | -2.5622467 | H                        | -3.1290388 | -0.8430063 | 1.8310194  | C                        | -1.8130587 | -1.9823801 | -0.6230213 |
| H                        | -1.1338137 | 4.1050840  | -2.2369341 | O                        | -3.4814413 | -2.4800485 | -0.5688806 | C                        | -0.6307208 | -2.6999828 | -0.4096143 |
| H                        | -0.3927850 | 2.6144344  | -1.5208889 | S                        | -4.6487862 | -2.0568779 | 0.3569116  | C                        | 0.6339783  | -2.0916354 | -0.2446874 |
| C                        | -1.2774568 | 4.1757619  | 0.7252241  | C440-(Meth)5/S0          |            |            | C          | 0.6898192                | -0.7004222 | -0.3130029 |            |
| H                        | -1.0870499 | 5.1682936  | 0.2961117  | Energy = -1170.858366966 |            |            | C          | -0.4930556               | 0.0673826  | -0.5103590 |            |
| H                        | -1.7746275 | 4.2757208  | 1.6966145  | C                        | -1.7576555 | -0.4780276 | -0.5850992 | C                        | 1.9186106  | -2.8356461 | -0.0094598 |
| H                        | -0.3479905 | 3.6031990  | 0.8288592  | C                        | -1.7996958 | -1.8958079 | -0.5000365 | C                        | 3.0612212  | -2.0620796 | 0.0577491  |
| O                        | -2.5881281 | 1.8369401  | 0.2361066  | C                        | -0.6403026 | -2.6244015 | -0.3099968 | C                        | 3.0946330  | -0.6472276 | -0.0498986 |
| S                        | -2.4498755 | 3.2573407  | -0.3677273 | C                        | 0.6227030  | -1.9958941 | -0.1912283 | O                        | 1.8178616  | 0.0292595  | -0.2058648 |
| C                        | -5.1596942 | -0.5469587 | -0.0056761 | C                        | 0.6377653  | -0.5822563 | -0.2804419 | O                        | 4.0731009  | 0.1338248  | -0.0199385 |
| H                        | -5.5338798 | -0.5095970 | -1.0355739 | C                        | -0.5156120 | 0.1699833  | -0.4689085 | C                        | 1.8985728  | -4.3149668 | 0.1375882  |
| H                        | -5.9816498 | -0.3467346 | 0.6951505  | C                        | 1.8745662  | -2.6823997 | 0.0000271  | N                        | -2.8537898 | 0.2263548  | -0.8562395 |
| H                        | -4.3348604 | 0.1663424  | 0.1310205  | C                        | 3.0310102  | -1.9480494 | 0.0868189  | H                        | -2.7676997 | -2.4924642 | -0.7449627 |
| C                        | -3.8612885 | -2.0149852 | 1.9452510  | C                        | 3.0366939  | -0.5152475 | -0.0181671 | H                        | -0.6859725 | -3.7890095 | -0.3698848 |
| H                        | -4.6753904 | -1.7705758 | 2.6404006  | O                        | 1.8142750  | 0.1233237  | -0.1891446 | H                        | -0.4177887 | 1.1550152  | -0.5351953 |
| H                        | -3.3905885 | -2.9613608 | 2.2350638  | O                        | 4.0289566  | 0.2205195  | 0.0302688  | H                        | 4.0413240  | -2.5251552 | 0.1966681  |
| H                        | -3.1137676 | -1.2137982 | 1.9039328  | C                        | 1.9148865  | -4.1816008 | 0.1054327  | H                        | 2.9080242  | -4.7012338 | 0.3297555  |
| O                        | -3.3707154 | -2.4981084 | -0.7013905 | N                        | -2.9262409 | 0.2514313  | -0.7264600 | H                        | 1.5101620  | -4.8263932 | -0.7662680 |
| S                        | -4.5670991 | -2.2805982 | 0.2544800  | H                        | -2.7628664 | -2.4009398 | -0.5883532 | H                        | 1.2469780  | -4.6424322 | 0.9730315  |
| C440-(DMSO)2/S1          |            |            |            | H                        | -0.6995457 | -3.7116243 | -0.2505345 | H                        | -2.7086271 | 1.2348322  | -1.0398660 |
| Energy = -1698.588869008 |            |            |            | H                        | -0.4400186 | 1.2557482  | -0.5296470 | H                        | -3.7537165 | -0.1978442 | -1.1438374 |
| C                        | 0.1315505  | -1.0878770 | -0.6101329 | H                        | 4.0057742  | -2.4169337 | 0.2270071  | C                        | -3.0422430 | 3.9651000  | -0.2006130 |
| C                        | 0.7205011  | -2.3575208 | -0.7178288 | H                        | 2.9421972  | -4.5361126 | 0.2497843  | H                        | -3.6869367 | 3.3656970  | 0.4538004  |
| C                        | 2.1033157  | -2.4690115 | -0.4970034 | H                        | 1.5121397  | -4.6523490 | -0.8044036 | H                        | -3.6545535 | 4.7222002  | -0.7152848 |
| C                        | 2.9373370  | -1.3783372 | -0.1742688 | H                        | 1.3037703  | -4.5354613 | 0.9499031  | H                        | -2.2740442 | 4.4642831  | 0.4098026  |
| C                        | 2.3414421  | -0.1187261 | -0.0677956 | H                        | -2.8180925 | 1.2218896  | -1.0506360 | O                        | -2.4496277 | 3.0451055  | -1.1438443 |
| C                        | 0.9415875  | 0.0262092  | -0.2870151 | H                        | -3.7310142 | -0.2469617 | -1.1293728 | H                        | -1.8344961 | 3.5296972  | -1.7192920 |
| C                        | 4.4185643  | -1.4703873 | 0.0662636  | C                        | -3.1987319 | 3.9774347  | -0.2064221 | C                        | -6.5505971 | -0.6117650 | -0.6869758 |
| C                        | 5.0691112  | -0.2878768 | 0.3639104  | H                        | -3.8395140 | 3.3396885  | 0.4152368  | H                        | -6.1855933 | -0.0527095 | 0.1836012  |
| C                        | 4.4756429  | 1.0020912  | 0.4709125  | H                        | -3.7968600 | 4.8161421  | -0.5986436 | H                        | -7.0387460 | -1.5384368 | -0.3461062 |
| O                        | 2.9865640  | 1.0206115  | 0.2307302  | H                        | -2.3787627 | 4.3729551  | 0.4146010  | H                        | -7.2773223 | 0.0085039  | -1.2348699 |
| O                        | 4.9554531  | 2.1025249  | 0.7234189  | O                        | -2.7038929 | 3.1428931  | -1.2745337 | O                        | -5.3908791 | -0.9029155 | -1.4980902 |
| C                        | 5.0941421  | -2.7907760 | -0.0307469 | H                        | -2.0809585 | 3.6594371  | -1.8123255 | H                        | -5.6717889 | -1.3552006 | -2.3103407 |
| N                        | -1.2094177 | -0.8273615 | -0.8138362 | C                        | -6.5541420 | -0.7711306 | -0.7427237 | C                        | 4.8709808  | 3.5052437  | -0.4985689 |
| H                        | 0.1173857  | -3.2294397 | -0.9672391 | H                        | -6.1801915 | -0.2687582 | 0.1585092  | H                        | 4.7417368  | 4.5901156  | -0.6283860 |
| H                        | 2.5594435  | -3.4569994 | -0.5817283 | H                        | -7.1581301 | -1.6454857 | -0.4494842 | H                        | 5.3345167  | 3.1053145  | -1.4209243 |
| H                        | 0.4940630  | 1.0136778  | -0.1827547 | H                        | -7.1845788 | -0.0642191 | -1.3062894 | H                        | 5.5834239  | 3.3469860  | 0.3341695  |
| H                        | 6.1467790  | -0.2938263 | 0.5440420  | O                        | -5.3930121 | -1.1694086 | -1.5028879 | O                        | 3.5902749  | 2.9468293  | -0.2391488 |
| H                        | 6.1703391  | -2.6980420 | 0.1691884  | H                        | -5.6881304 | -1.5442519 | -2.3490285 | H                        | 3.7095119  | 1.9725077  | -0.1356126 |
| H                        | 4.9770122  | -3.2518320 | -1.0334363 | C                        | 5.0962519  | 3.5645696  | -0.4667218 | C                        | -4.1807577 | 0.8088375  | 2.9473421  |
| H                        | 4.6811223  | -3.5296902 | 0.6869076  | H                        | 5.0586271  | 4.6557820  | -0.5935376 | H                        | -3.2291480 | 1.2611027  | 3.2747145  |
| H                        | -1.5487686 | 0.1302319  | -0.6362070 | H                        | 5.5246627  | 3.1302202  | -1.3902843 | H                        | -4.1442157 | -0.2765323 | 3.1422986  |
| H                        | -1.9275203 | -1.5724682 | -0.8629577 | H                        | 5.7887918  | 3.3446805  | 0.3684301  | H                        | -4.9934849 | 1.2412966  | 3.5440897  |
| C                        | -1.0588981 | 3.6128292  | -1.6421684 | O                        | 3.7693982  | 3.1195717  | -0.2125603 | O                        | -4.4759958 | 1.1023661  | 1.5745511  |
| H                        | -1.6641502 | 3.3171808  | -2.5065144 | H                        | 3.7998316  | 2.1430689  | -0.1085716 | H                        | -3.7706980 | 0.7149789  | 1.0153531  |
| H                        | -0.8354175 | 4.6866627  | -1.6895021 | C                        | -4.1269086 | 0.7516543  | 2.8631521  | C                        | 7.4888294  | -0.7665134 | 0.6058837  |
| H                        | -0.1363346 | 3.0217829  | -1.5975553 | H                        | -3.1600929 | 1.2273087  | 3.1075162  | H                        | 7.1843874  | -0.6241058 | 1.6605771  |
| C                        | -0.8033971 | 3.7017220  | 1.1138396  | H                        | -4.0310417 | -0.3363344 | 3.0315649  | H                        | 8.3443075  | -1.4573622 | 0.5915103  |
| H                        | -0.5856526 | 4.7760553  | 1.0510128  | H                        | -4.8838760 | 1.1397049  | 3.5575643  | H                        | 7.8367341  | 0.2102643  | 0.2181754  |
| H                        | -1.2401790 | 3.4657140  | 2.0906842  | O                        | -4.5676496 | 1.0616461  | 1.5402081  | O                        | 6.4631183  | -1.3385506 | -0.1948437 |
| H                        | 0.1030660  | 3.1080253  | 0.9448115  | H                        | -3.8954838 | 0.7245058  | 0.8970449  | H                        | 5.6776255  | -0.7393391 | -0.1603204 |
| O                        | -2.3051175 | 1.7499429  | -0.0743165 | C                        | 7.5448455  | -1.0434482 | 0.5156459  | C460-(Meth)3/S0          |            |            |            |
| S                        | -2.0876819 | 3.2871538  | -0.1450612 | H                        | 7.5173724  | -0.5659410 | 1.5128723  | Energy = -1096.571804896 |            |            |            |
| C                        | -5.1378873 | -0.3441098 | -0.1368901 | H                        | 8.2270525  | -1.9029481 | 0.5712565  | C                        | -2.0019864 | -0.4148180 | 0.4421052  |

|                          |            |            |            |                          |            |            |            |                          |            |            |            |
|--------------------------|------------|------------|------------|--------------------------|------------|------------|------------|--------------------------|------------|------------|------------|
| C                        | -1.9887833 | -1.8402569 | 0.4811225  | C                        | 2.3891122  | -1.7162791 | -0.5592024 | H                        | -0.9166108 | 1.3515955  | -0.1748420 |
| C                        | -0.8095297 | -2.5523783 | 0.3404283  | C                        | 2.3493197  | -0.2798848 | -0.5585564 | H                        | 3.4948185  | -2.4259164 | -0.1663656 |
| C                        | 0.4365658  | -1.9129427 | 0.1671768  | O                        | 1.1121568  | 0.3325551  | -0.3960529 | H                        | 2.4385792  | -4.4567944 | 0.5815901  |
| C                        | 0.4101801  | -0.4993423 | 0.1497088  | O                        | 3.3141061  | 0.4807567  | -0.6897155 | H                        | 0.7431730  | -4.6556078 | 0.0913254  |
| C                        | -0.7594726 | 0.2382738  | 0.2889033  | C                        | 1.3466191  | -3.9792821 | -0.3965031 | H                        | 1.1332097  | -4.2301489 | 1.7644270  |
| C                        | 1.7059968  | -2.5809380 | 0.0172012  | N                        | -3.6303945 | 0.3905932  | 0.2145573  | H                        | -4.2052802 | 2.1961253  | 1.5913410  |
| C                        | 2.8381803  | -1.8227599 | -0.1383269 | C                        | -3.5818149 | 1.8254961  | 0.5229407  | H                        | -2.8447128 | 1.3844658  | 2.3949073  |
| C                        | 2.8018044  | -0.3844920 | -0.1507352 | C                        | -4.8789088 | -0.3436074 | 0.4864896  | H                        | -5.1288359 | -0.1705316 | -0.3093854 |
| O                        | 1.5640494  | 0.2315313  | -0.0013565 | C                        | -3.2753812 | 2.1409980  | 1.9929208  | H                        | -3.7462769 | 0.0686847  | -1.3844943 |
| O                        | 3.7678623  | 0.3721188  | -0.2845475 | C                        | -6.1573785 | 0.4706811  | 0.3009000  | H                        | -4.3301070 | -0.5767591 | 2.9467086  |
| C                        | 1.7834849  | -4.0817139 | 0.0269003  | H                        | -3.3501465 | -2.3117657 | 0.2620117  | H                        | -5.7001317 | 0.2164560  | 2.1193115  |
| N                        | -3.1986393 | 0.3079871  | 0.5103225  | H                        | -1.2935949 | -3.5488624 | -0.0367931 | H                        | -4.9985943 | 0.9447155  | 3.5818030  |
| C                        | -3.1385322 | 1.7333256  | 0.8938797  | H                        | -1.1091435 | 1.4154776  | -0.0783540 | H                        | -5.4804543 | 1.7491749  | -1.8753890 |
| C                        | -4.4277637 | -0.4298680 | 0.8943637  | H                        | 3.3756856  | -2.1636600 | -0.6854291 | H                        | -4.0713625 | 2.5945724  | -1.1945111 |
| C                        | -2.8452674 | 1.9772516  | 2.3779999  | H                        | 2.3840692  | -4.3096586 | -0.5261923 | H                        | -5.5265617 | 2.3169964  | -0.1986863 |
| C                        | -5.7190873 | 0.3740100  | 0.7612275  | H                        | 0.7411406  | -4.4144705 | -1.2062989 | C                        | 3.5972899  | 3.4833527  | -0.5366672 |
| H                        | -2.9107402 | -2.3967496 | 0.6258802  | H                        | 0.9678249  | -4.3946848 | 0.5502239  | H                        | 3.6837118  | 4.5314148  | -0.8529784 |
| H                        | -0.8496340 | -3.6417334 | 0.3756614  | H                        | -4.5449759 | 2.2630067  | 0.2359161  | H                        | 4.5246817  | 3.1911755  | -0.0084833 |
| H                        | -0.6647770 | 1.3210981  | 0.2670073  | H                        | -2.8415766 | 2.2986559  | -0.1355517 | H                        | 2.7660531  | 3.3933246  | 0.1872756  |
| H                        | 3.8246252  | -2.2727134 | -0.2577346 | H                        | -4.8610758 | -0.7759482 | 1.5061649  | O                        | 3.3772829  | 2.6895759  | -1.6860067 |
| H                        | 2.8189144  | -4.4213530 | -0.0922255 | H                        | -4.9198198 | -1.1897212 | -0.2139944 | H                        | 3.3226795  | 1.7257161  | -1.3877167 |
| H                        | 1.1819925  | -4.5132897 | -0.7879990 | H                        | -2.3124858 | 1.7098788  | 2.2995172  | C                        | 6.3458029  | 0.2394061  | -2.5422038 |
| H                        | 1.3913237  | -4.4917467 | 0.9704153  | H                        | -4.0552459 | 1.7401574  | 2.6565529  | H                        | 7.2648649  | -0.1494818 | -3.0008016 |
| H                        | -4.0961008 | 2.1853053  | 0.6110183  | H                        | -3.2263483 | 3.2287412  | 2.1476555  | H                        | 5.5454125  | 0.2802817  | -3.3038895 |
| H                        | -2.3885180 | 2.2294075  | 0.2647106  | H                        | -7.0168084 | -0.2061690 | 0.4072613  | H                        | 6.5337059  | 1.2791237  | -2.2113625 |
| H                        | -4.3286630 | -0.8246995 | 1.9234734  | H                        | -6.2085916 | 0.9209126  | -0.7005895 | O                        | 6.0007754  | -0.6019203 | -1.4575480 |
| H                        | -4.5062872 | -1.2947621 | 0.2220639  | H                        | -6.2750349 | 1.2645742  | 1.0504026  | H                        | 5.0664160  | -0.3672894 | -1.1718530 |
| H                        | -1.8822167 | 1.5390055  | 2.6743054  | C                        | 3.9545240  | 3.9315913  | -0.0088100 | C500-DMF/S0              |            |            |            |
| H                        | -3.6290832 | 1.5454528  | 3.0170118  | H                        | 3.7984686  | 5.0186518  | 0.0365885  | Energy = -1217.079130983 |            |            |            |
| H                        | -2.8032001 | 3.0570290  | 2.5810573  | H                        | 4.9142080  | 3.7489777  | -0.5291990 | C                        | -0.8076007 | 1.1882879  | -0.3674644 |
| H                        | -6.5649008 | -0.3051242 | 0.9389919  | H                        | 4.0522599  | 3.5592452  | 1.0291781  | C                        | -0.6863837 | -0.2354695 | -0.3958208 |
| H                        | -5.8280757 | 0.7885671  | -0.2504905 | O                        | 2.8418259  | 3.3709545  | -0.6946761 | C                        | 0.5394944  | -0.8495121 | -0.2728390 |
| H                        | -5.7961886 | 1.1863843  | 1.4965143  | H                        | 2.9749583  | 2.3986078  | -0.7336251 | C                        | 1.7344752  | -0.0996648 | -0.1088134 |
| C                        | 4.4043110  | 3.8386580  | 0.3895779  | C                        | 6.8680322  | -0.6866392 | -1.1785437 | C                        | 1.5992984  | 1.3147003  | -0.0837130 |
| H                        | 4.2417769  | 4.9246044  | 0.4365945  | H                        | 7.5674580  | -1.5320103 | -1.2330027 | C                        | 0.3687334  | 1.9511043  | -0.2045289 |
| H                        | 5.3562981  | 3.6615877  | -0.1464623 | H                        | 6.8543891  | -0.1905403 | -2.1665317 | C                        | 3.0608354  | -0.6273379 | 0.0301689  |
| H                        | 4.5207118  | 3.4675701  | 1.4259338  | H                        | 7.2596486  | 0.0325238  | -0.4352378 | C                        | 4.1417735  | 0.1974238  | 0.1858777  |
| O                        | 3.2838185  | 3.2704964  | -0.2782327 | O                        | 5.5955752  | -1.2102722 | -0.8112401 | C                        | 4.0053467  | 1.6377344  | 0.2177523  |
| C                        | 3.4249533  | 2.3000999  | -0.3230313 | H                        | 4.9457734  | -0.4717435 | -0.7832464 | O                        | 2.6865749  | 2.1358081  | 0.0741932  |
| C                        | -3.4518669 | 0.7354350  | -3.4533482 | C460-(Meth)2/S3          |            |            |            | O                        | 4.8955146  | 2.4523821  | 0.3536553  |
| H                        | -2.9014058 | -0.2061883 | -3.6282625 | Energy = -980.7610000453 |            |            |            | C                        | 3.2841517  | -2.1285275 | 0.0057431  |
| H                        | -2.7248819 | 1.5665603  | -3.4229156 | C                        | -2.1908318 | -0.2633108 | 0.5481064  | F                        | 2.8546359  | -2.6828914 | -1.1669481 |
| H                        | -4.1242454 | 0.9016771  | -4.3049677 | C                        | -2.2456179 | -1.6065381 | 0.9186953  | F                        | 2.6041179  | -2.7556544 | 1.0122333  |
| O                        | -4.2690844 | 0.6792216  | -2.2816694 | C                        | -1.0868951 | -2.3879486 | 0.8585069  | F                        | 4.5911670  | -2.4668493 | 0.1451731  |
| H                        | -3.6942972 | 0.5285917  | -1.5007755 | C                        | 0.1593875  | -1.8572672 | 0.4351959  | N                        | -2.0406594 | 1.7498990  | -0.5166942 |
| C                        | 7.3344837  | -0.7908466 | -0.7788022 | C                        | 0.1662810  | -0.4815941 | 0.0708973  | C                        | -2.3152453 | 3.1793274  | -0.4969938 |
| H                        | 8.0372074  | -1.6344398 | -0.8135554 | C                        | -0.9803620 | 0.3038514  | 0.1183048  | C                        | -2.4229251 | 3.7828983  | 0.9110012  |
| H                        | 7.3787789  | -0.2685156 | -1.7525467 | C                        | 1.3826361  | -2.5975232 | 0.3520105  | H                        | -1.5877779 | -0.8340804 | -0.5354123 |
| H                        | 7.6793877  | -0.0919284 | 0.0056383  | C                        | 2.5401755  | -1.9076698 | -0.0883139 | H                        | 0.5889883  | -1.9369681 | -0.3052653 |
| O                        | 6.0424492  | -1.3242649 | -0.5031033 | C                        | 2.5331321  | -0.5621233 | -0.4407036 | H                        | 0.3511156  | 3.0386270  | -0.1650175 |
| H                        | 5.3988252  | -0.5820496 | -0.4544840 | O                        | 1.3156019  | 0.1548337  | -0.3511213 | H                        | 5.1525420  | -0.1877744 | 0.2923046  |
| C460-(Meth)2/S0          |            |            |            | O                        | 3.4939538  | 0.1638865  | -0.8460145 | H                        | -2.8493830 | 1.1173592  | -0.5553345 |
| Energy = -980.7927729870 |            |            |            | C                        | 1.4269752  | -4.0512735 | 0.7143698  | H                        | -3.2593540 | 3.3305329  | -1.0401524 |
| C                        | -2.4498948 | -0.3216147 | 0.0903915  | N                        | -3.3742192 | 0.5762012  | 0.5732030  | H                        | -1.5375107 | 3.7021715  | -1.0767796 |
| C                        | -2.4324902 | -1.7508511 | 0.1051879  | C                        | -3.7646519 | 1.2135742  | 1.8216544  | H                        | -1.4944840 | 3.6384384  | 1.4804875  |
| C                        | -1.2551580 | -2.4588818 | -0.0593603 | C                        | -4.2976980 | 0.5234834  | -0.5525296 | H                        | -3.2431400 | 3.3147526  | 1.4735963  |
| C                        | -0.0100996 | -1.8169101 | -0.2389378 | C                        | -4.7613643 | 0.3913250  | 2.6627898  | H                        | -2.6219206 | 4.8633974  | 0.8507911  |
| C                        | -0.0399941 | -0.4017392 | -0.2382518 | C                        | -4.8753089 | 1.8809522  | -0.9681908 | C                        | -4.9752227 | -0.5757815 | 0.3764082  |
| C                        | -1.2058276 | 0.3328387  | -0.0721734 | H                        | -3.1878377 | -2.0558009 | 1.2353226  | H                        | -4.5809793 | -0.5352596 | 1.4146343  |
| C                        | 1.2586674  | -2.4785550 | -0.4005702 | H                        | -1.1428852 | -3.4387661 | 1.1423119  | O                        | -4.4345196 | 0.0219796  | -0.5609376 |

|                          |            |            |            |                          |            |            |            |                          |            |            |            |
|--------------------------|------------|------------|------------|--------------------------|------------|------------|------------|--------------------------|------------|------------|------------|
| N                        | -6.0899775 | -1.3429725 | 0.2750827  | C                        | 4.1454323  | 0.3096977  | 0.0943899  | H                        | -3.1045767 | 4.6702914  | 0.8126886  |
| C                        | -6.7536896 | -1.5216979 | -1.0113243 | C                        | 3.9638967  | 1.7451042  | 0.0835286  | C                        | -4.3077440 | -2.6482153 | 0.6148330  |
| H                        | -6.7705288 | -2.5869207 | -1.2886699 | O                        | 2.6252387  | 2.1967030  | -0.0200061 | H                        | -3.2717878 | -2.5203539 | 0.9486049  |
| H                        | -7.7897743 | -1.1528156 | -0.9623147 | O                        | 4.8323216  | 2.5914160  | 0.1534951  | H                        | -4.8599769 | -3.2673007 | 1.3339090  |
| H                        | -6.1974162 | -0.9550491 | -1.7658098 | C                        | 3.3569208  | -2.0462589 | 0.0263586  | H                        | -4.3345382 | -3.0811252 | -0.3925765 |
| C                        | -6.6594371 | -2.0163856 | 1.4337548  | F                        | 2.9027257  | -2.6541058 | -1.1101199 | C                        | -6.6877076 | -1.4540957 | -0.1375046 |
| H                        | -6.0547892 | -1.7916697 | 2.3219113  | F                        | 2.7356857  | -2.6598234 | 1.0783492  | H                        | -7.2144383 | -2.0947197 | 0.5817020  |
| H                        | -7.6910606 | -1.6760364 | 1.6149411  | F                        | 4.6786632  | -2.3389300 | 0.1268058  | H                        | -7.2494302 | -0.5271807 | -0.2983137 |
| H                        | -6.6720305 | -3.1073223 | 1.2837392  | N                        | -2.1069444 | 1.6408165  | -0.4052300 | H                        | -6.5210775 | -1.9701068 | -1.0907667 |
| C500-DMF/S1              |            |            |            | C                        | -2.4303838 | 3.0589144  | -0.4317652 | O                        | -4.3317592 | -0.2101665 | -0.5877076 |
| Energy = -1217.066968693 |            |            |            | C                        | -2.5094747 | 3.7131032  | 0.9553921  | S                        | -5.0541796 | -0.9623269 | 0.5615357  |
| C                        | 0.6076379  | 0.8812094  | -0.4566343 | H                        | -1.5764643 | -0.9201252 | -0.3617097 | C500-(Meth)4/S0          |            |            |            |
| C                        | 0.7209872  | -0.5250328 | -0.4903192 | H                        | 0.6473689  | -1.9501154 | -0.1863555 | Energy = -1431.587287901 |            |            |            |
| C                        | 1.9767245  | -1.1155158 | -0.3600685 | H                        | 0.2531432  | 3.0177523  | -0.1914467 | C                        | -1.6888835 | -0.1396368 | 0.4428503  |
| C                        | 3.1590299  | -0.3701304 | -0.1880523 | H                        | 5.1714472  | -0.0402078 | 0.1728600  | C                        | -1.6376734 | -1.5618711 | 0.5305757  |
| C                        | 3.0435145  | 1.0145691  | -0.1513360 | H                        | -2.8876749 | 0.9739714  | -0.4283770 | C                        | -0.4414369 | -2.2387562 | 0.4286590  |
| C                        | 1.7701018  | 1.6544404  | -0.2891401 | H                        | -3.3975499 | 3.1574891  | -0.9460574 | C                        | 0.7858595  | -1.5488432 | 0.2429538  |
| C                        | 4.5494859  | -0.9458049 | -0.0414602 | H                        | -1.6924452 | 3.5859999  | -1.0584203 | C                        | 0.7101768  | -0.1350715 | 0.1672851  |
| C                        | 5.5834054  | -0.0494317 | 0.1126160  | H                        | -1.5560087 | 3.6234963  | 1.4937907  | C                        | -0.4856809 | 0.5667602  | 0.2683633  |
| C                        | 5.4424215  | 1.3763029  | 0.1436232  | H                        | -3.2896448 | 3.2374382  | 1.5664885  | C                        | 2.0902854  | -2.1356654 | 0.1209744  |
| O                        | 4.0709046  | 1.8776905  | 0.0053365  | H                        | -2.7501764 | 4.7827729  | 0.8625559  | C                        | 3.2060388  | -1.3615906 | -0.0540449 |
| O                        | 6.3060673  | 2.2309700  | 0.2705157  | C                        | -5.2196654 | -2.0480953 | 1.4301855  | C                        | 3.1041791  | 0.0745964  | -0.1185361 |
| C                        | 4.7645765  | -2.3965446 | -0.0514513 | H                        | -4.5742012 | -1.6174237 | 2.2039782  | O                        | 1.8378341  | 0.6309280  | -0.0058493 |
| F                        | 4.3121240  | -3.0106141 | -1.2214126 | H                        | -6.1669927 | -2.3826815 | 1.8729216  | O                        | 4.0367597  | 0.8659202  | -0.2688561 |
| F                        | 4.0594802  | -3.0637225 | 0.9541479  | H                        | -4.7034477 | -2.8689927 | 0.9175803  | C                        | 2.2474415  | -3.6468987 | 0.1818636  |
| F                        | 6.0687593  | -2.7508843 | 0.0911799  | C                        | -6.5042006 | -1.7169245 | -0.9948084 | F                        | 1.5315963  | -4.2578236 | -0.8085304 |
| N                        | -0.6390112 | 1.4888728  | -0.5883928 | H                        | -7.4366778 | -2.0623764 | -0.5296834 | F                        | 1.7924651  | -4.1444040 | 1.3688818  |
| C                        | -0.8935840 | 2.9125954  | -0.5714961 | H                        | -6.7266913 | -1.0622783 | -1.8448619 | F                        | 3.5328274  | -4.0433593 | 0.0476310  |
| C                        | -1.0116157 | 3.5098586  | 0.8468448  | H                        | -5.8782960 | -2.5582654 | -1.3165313 | N                        | -2.9226033 | 0.4837219  | 0.4793076  |
| H                        | -0.1682356 | -1.1372645 | -0.6364141 | O                        | -4.1972365 | -0.3981686 | -0.4736884 | C                        | -3.0853907 | 1.9184957  | 0.7426019  |
| H                        | 2.0443982  | -2.2024275 | -0.3972079 | S                        | -5.5498416 | -0.6971577 | 0.2134667  | C                        | -2.8076881 | 2.3281479  | 2.1935460  |
| H                        | 1.7539110  | 2.7423365  | -0.2593241 | C500-DMSO/S1             |            |            |            | H                        | -2.5703564 | -2.1101749 | 0.6763750  |
| H                        | 6.6085037  | -0.4024566 | 0.2234787  | Energy = -1521.765770282 |            |            |            | H                        | -0.4415199 | -3.3251285 | 0.5010929  |
| H                        | -1.4660341 | 0.8643490  | -0.5958870 | C                        | -0.9313068 | 1.1308422  | -0.5137657 | H                        | -0.4483237 | 1.6527064  | 0.2050352  |
| H                        | -1.8362835 | 3.0744131  | -1.1144723 | C                        | -0.7204840 | -0.2384269 | -0.7771647 | H                        | 4.2091485  | -1.7778216 | -0.1488775 |
| H                        | -0.1018663 | 3.4335687  | -1.1315723 | C                        | 0.5581873  | -0.7764125 | -0.6283515 | H                        | -3.6921308 | -0.1097821 | 0.8311702  |
| H                        | -0.0850153 | 3.3567907  | 1.4158638  | C                        | 1.6630689  | -0.0080504 | -0.2195421 | H                        | -4.1199308 | 2.1713415  | 0.4695472  |
| H                        | -1.8388207 | 3.0439923  | 1.3993366  | C                        | 1.4563823  | 1.3484639  | 0.0053758  | H                        | -2.4392598 | 2.4804782  | 0.0517984  |
| H                        | -1.2049109 | 4.5901179  | 0.7783947  | C                        | 0.1572576  | 1.9315983  | -0.1313606 | H                        | -1.7771485 | 2.0876333  | 2.4882842  |
| C                        | -3.5096853 | -0.7915111 | 0.3232578  | C                        | 3.0672747  | -0.5290790 | -0.0058837 | H                        | -3.4902158 | 1.8116510  | 2.8834338  |
| H                        | -3.1129902 | -0.7795593 | 1.3599912  | C                        | 4.0579969  | 0.4125466  | 0.1479992  | H                        | -2.9521708 | 3.4112310  | 2.3173664  |
| O                        | -2.9941968 | -0.1317614 | -0.5906474 | C                        | 3.8349543  | 1.8256246  | 0.2574419  | C                        | -6.4657627 | -1.5013173 | 1.2529184  |
| N                        | -4.5912960 | -1.5932492 | 0.1877049  | O                        | 2.4300318  | 2.2384185  | 0.3040313  | H                        | -6.3295547 | -1.6772878 | 2.3274913  |
| C                        | -5.2467867 | -1.7471162 | -1.1072610 | O                        | 4.6559394  | 2.7257026  | 0.3493765  | H                        | -6.9957089 | -2.3687974 | 0.8247087  |
| H                        | -5.2354305 | -2.8034820 | -1.4154708 | C                        | 3.3377592  | -1.9701687 | 0.0291784  | H                        | -7.0926462 | -0.6026082 | 1.1207622  |
| H                        | -6.2917892 | -1.4063420 | -1.0497019 | F                        | 3.0374053  | -2.6215435 | -1.1737902 | O                        | -5.1651239 | -1.3422613 | 0.6769774  |
| H                        | -4.7036346 | -1.1440429 | -1.8424112 | F                        | 2.5564334  | -2.6465350 | 0.9637778  | H                        | -5.2477934 | -1.1534203 | -0.2921528 |
| C                        | -5.1407694 | -2.3294446 | 1.3189144  | F                        | 4.6341883  | -2.2696908 | 0.3067185  | C                        | 4.5164634  | 4.4242909  | 0.2246009  |
| H                        | -4.5467987 | -2.1193965 | 2.2175513  | N                        | -2.2174986 | 1.6701101  | -0.6051105 | H                        | 4.2769745  | 5.4964947  | 0.2445460  |
| H                        | -6.1832182 | -2.0297278 | 1.5069765  | C                        | -2.5488698 | 3.0757528  | -0.5600186 | H                        | 5.4402640  | 4.2940997  | -0.3703457 |
| H                        | -5.1161626 | -3.4128931 | 1.1260157  | C                        | -2.8399519 | 3.6040438  | 0.8614000  | H                        | 4.7280170  | 4.1035493  | 1.2622493  |
| C500-DMSO/S0             |            |            |            | H                        | -1.5544206 | -0.8577872 | -1.1074576 | O                        | 3.3980381  | 3.7512131  | -0.3440844 |
| Energy = -1521.781377618 |            |            |            | H                        | 0.7066071  | -1.8350072 | -0.8415013 | H                        | 3.6034538  | 2.7925524  | -0.3590485 |
| C                        | -0.8505024 | 1.1251767  | -0.2904396 | H                        | 0.0636571  | 2.9975987  | 0.0692684  | C                        | -4.3265736 | -0.8406009 | -3.0770610 |
| C                        | -0.6861085 | -0.2945780 | -0.2798579 | H                        | 5.1026303  | 0.1137215  | 0.2359601  | H                        | -3.5834532 | -1.6500813 | -2.9889568 |
| C                        | 0.5631220  | -0.8643171 | -0.1860723 | H                        | -3.0038731 | 0.9925779  | -0.5927764 | H                        | -3.9296079 | -0.0570096 | -3.7422615 |
| C                        | 1.7391034  | -0.0722543 | -0.0936252 | H                        | -3.4443920 | 3.2181064  | -1.1853058 | H                        | -5.2407066 | -1.2473193 | -3.5258736 |
| C                        | 1.5592776  | 1.3372307  | -0.1065718 | H                        | -1.7345168 | 3.6546707  | -1.0197912 | O                        | -4.6935682 | -0.3020913 | -1.7966360 |
| C                        | 0.3048416  | 1.9305585  | -0.1977537 | H                        | -1.9617395 | 3.4905837  | 1.5108866  | H                        | -3.8970706 | 0.0739426  | -1.3575559 |
| C                        | 3.0860725  | -0.5529856 | 0.0097162  | H                        | -3.6787464 | 3.0596261  | 1.3154815  | C                        | 7.4724619  | -0.3894333 | -1.1752845 |

|                          |            |            |            |                          |            |            |            |                          |            |            |            |
|--------------------------|------------|------------|------------|--------------------------|------------|------------|------------|--------------------------|------------|------------|------------|
| H                        | 8.0037427  | 0.5193834  | -0.8376152 | Energy = -1256.407140059 | F          | 5.2093569  | -2.0302209 | 0.2192582                |            |            |            |
| H                        | 7.1410026  | -0.2301003 | -2.2180029 | C                        | -0.6777625 | 0.8025487  | -0.1644279 | N                        | -2.0293762 | 1.2566502  | -0.2139694 |
| H                        | 8.1871786  | -1.2229250 | -1.1675804 | C                        | -0.3764386 | -0.6013699 | -0.0608581 | C                        | -2.4434392 | 2.6450022  | -0.2261578 |
| O                        | 6.3992513  | -0.7428451 | -0.3044953 | C                        | 0.9445758  | -1.0045092 | -0.0052096 | C                        | -2.4550704 | 3.2972513  | 1.1715238  |
| H                        | 5.7428626  | -0.0121938 | -0.3080776 | C                        | 2.0318988  | -0.0945156 | -0.0452683 | C                        | -1.5405925 | -1.6064462 | -0.0058881 |
| C500-(Meth)4/S3          |            |            |            | C                        | 1.7051627  | 1.2816575  | -0.1518031 | H                        | 1.1247323  | -2.0420006 | 0.0603648  |
| Energy = -1431.572922614 |            |            |            | C                        | 0.3901308  | 1.7242686  | -0.2050665 | H                        | 0.1834221  | 2.7950376  | -0.3074029 |
| C                        | -1.5697693 | -0.0104676 | 0.7827003  | C                        | 3.4264724  | -0.4265684 | 0.0120107  | H                        | 5.4413235  | 0.3543492  | -0.0683611 |
| C                        | -1.5909556 | -1.4218044 | 0.7916646  | C                        | 4.3897871  | 0.5444474  | -0.0369252 | H                        | -2.8014295 | 0.5782321  | -0.1354357 |
| C                        | -0.4101187 | -2.1309695 | 0.5774572  | C                        | 4.0561701  | 1.9485577  | -0.1485414 | H                        | -3.4579996 | 2.6624775  | -0.6470197 |
| C                        | 0.8265294  | -1.4961187 | 0.3528568  | O                        | 2.6742865  | 2.2519110  | -0.1979223 | H                        | -1.7937482 | 3.2189701  | -0.9046739 |
| C                        | 0.8350573  | -0.1082359 | 0.3500865  | O                        | 4.8335893  | 2.8805542  | -0.2016659 | H                        | -1.4517878 | 3.2892899  | 1.6180513  |
| C                        | -0.3533303 | 0.6536640  | 0.5594404  | C                        | 3.8564589  | -1.8770484 | 0.1313591  | H                        | -3.1393597 | 2.7609535  | 1.8420608  |
| C                        | 2.1557420  | -2.1866979 | 0.1384200  | F                        | 3.4154701  | -2.6229855 | -0.9256028 | H                        | -2.7923762 | 4.3405050  | 1.0889071  |
| C                        | 3.2643445  | -1.3865017 | 0.0162845  | F                        | 3.3563537  | -2.4592644 | 1.2623049  | H                        | -2.1637966 | -1.5871531 | -0.9170022 |
| C                        | 3.2165192  | 0.0445818  | 0.0234367  | F                        | 5.2052383  | -2.0226847 | 0.1784926  | H                        | -2.2146106 | -1.4488702 | 0.8530220  |
| O                        | 1.9422421  | 0.6562245  | 0.1751212  | N                        | -1.9781918 | 1.2088553  | -0.2410488 | H                        | -1.1227025 | -2.6171065 | 0.0841457  |
| O                        | 4.1667611  | 0.8390654  | -0.1001122 | C                        | -2.4159274 | 2.5982027  | -0.2976034 | C                        | -5.3246618 | -0.8834500 | -0.2862952 |
| C                        | 2.2381649  | -3.6581250 | 0.0913294  | C                        | -2.4321421 | 3.3045306  | 1.0650903  | H                        | -4.8702923 | -1.8013874 | -0.7150942 |
| F                        | 1.4407689  | -4.2026628 | -0.9098558 | C                        | -1.4920146 | -1.6123087 | -0.0211799 | O                        | -4.6548124 | 0.1244482  | -0.0263923 |
| F                        | 1.7741377  | -4.2607392 | 1.2547921  | H                        | 1.1510802  | -2.0718115 | 0.0729459  | N                        | -6.6597202 | -1.0074676 | -0.0909684 |
| F                        | 3.4961541  | -4.1186809 | -0.1147308 | H                        | 0.2172985  | 2.7962004  | -0.2766397 | C                        | -7.4379391 | 0.0920120  | 0.4687737  |
| N                        | -2.7558565 | 0.7129361  | 0.9378557  | H                        | 5.4500302  | 0.3090511  | 0.0055365  | H                        | -8.2141045 | 0.4125004  | -0.2428693 |
| C                        | -2.8488663 | 2.1153517  | 1.2767059  | H                        | -2.7289362 | 0.5188626  | -0.1649574 | H                        | -7.9244818 | -0.2225259 | 1.4046056  |
| C                        | -2.5698343 | 2.4182891  | 2.7645562  | H                        | -3.4283253 | 2.5884087  | -0.7239843 | H                        | -6.7588661 | 0.9267342  | 0.6715183  |
| H                        | -2.5313667 | -1.9453831 | 0.9583179  | H                        | -1.7794923 | 3.1493386  | -1.0086197 | C                        | -7.3676642 | -2.2353604 | -0.4290504 |
| H                        | -0.4463847 | -3.2197555 | 0.5986974  | H                        | -1.4341435 | 3.3152798  | 1.5243021  | H                        | -6.6585159 | -2.9679948 | -0.8349346 |
| H                        | -0.2685907 | 1.7380457  | 0.5083222  | H                        | -3.1191393 | 2.7950734  | 1.7550531  | H                        | -7.8467323 | -2.6659468 | 0.4637888  |
| H                        | 4.2624327  | -1.8110349 | -0.1060236 | H                        | -2.7666065 | 4.3466740  | 0.9519092  | H                        | -8.1444060 | -2.0407562 | -1.1847354 |
| H                        | -3.6397196 | 0.1736299  | 0.8546827  | H                        | -2.1128819 | -1.5669767 | -0.9316628 | C503-DMSO/S0             |            |            |            |
| H                        | -3.8668038 | 2.4368970  | 1.0164026  | H                        | -2.1658276 | -1.4461891 | 0.8354926  | Energy = -1561.109006776 |            |            |            |
| H                        | -2.1536448 | 2.7009995  | 0.6525077  | H                        | -1.0886597 | -2.6296747 | 0.0602025  | C                        | -0.7061859 | 0.7121537  | -0.1224990 |
| H                        | -1.5628100 | 2.0862900  | 3.0499392  | C                        | -5.4193650 | -0.9590363 | -0.2028685 | C                        | -0.3501423 | -0.6764489 | 0.0102851  |
| H                        | -3.3012884 | 1.9136285  | 3.4095076  | H                        | -5.0259527 | -1.9616526 | -0.4780276 | C                        | 0.9867100  | -1.0258744 | 0.0516450  |
| H                        | -2.6400561 | 3.5019424  | 2.9358030  | O                        | -4.6854353 | 0.0242068  | -0.0671289 | C                        | 2.0376600  | -0.0766156 | -0.0318709 |
| C                        | -6.3271812 | -1.1303119 | 0.7254108  | N                        | -6.7683839 | -0.9622935 | -0.0412572 | C                        | 1.6562719  | 1.2825477  | -0.1686867 |
| H                        | -6.2962850 | -1.0882662 | 1.8213840  | C                        | -7.4765594 | 0.2591908  | 0.3219429  | C                        | 0.3240570  | 1.6725631  | -0.2084302 |
| H                        | -6.5976530 | -2.1570797 | 0.4269862  | H                        | -8.2060052 | 0.5266465  | -0.4581457 | C                        | 3.4447076  | -0.3526021 | 0.0071186  |
| H                        | -7.1064642 | -0.4361844 | 0.3682593  | H                        | -8.0118488 | 0.1235375  | 1.2743794  | C                        | 4.3686694  | 0.6530768  | -0.0847968 |
| O                        | -5.0271897 | -0.7693960 | 0.2458612  | H                        | -6.7408352 | 1.0636792  | 0.4269414  | C                        | 3.9793658  | 2.0396925  | -0.2256110 |
| H                        | -5.0229001 | -0.7538655 | -0.7460275 | C                        | -7.5546978 | -2.1735120 | -0.2258011 | O                        | 2.5858283  | 2.2879188  | -0.2593836 |
| C                        | 4.3163005  | 4.4227289  | 0.2313003  | H                        | -6.8891657 | -3.0052095 | -0.4909080 | O                        | 4.7183635  | 2.9999323  | -0.3173153 |
| H                        | 3.9467970  | 5.4581318  | 0.2511338  | H                        | -8.0923910 | -2.4346826 | 0.6992005  | C                        | 3.9333578  | -1.7818602 | 0.1521507  |
| H                        | 5.2825614  | 4.4176297  | -0.3084349 | H                        | -8.2917984 | -2.0420473 | -1.0335825 | F                        | 3.5041269  | -2.5685906 | -0.8799586 |
| H                        | 4.5062656  | 4.1081003  | 1.2747227  | C503-DMF/S1              |            |            |            | F                        | 3.4763041  | -2.3570924 | 1.3047327  |
| O                        | 3.3255894  | 3.6282657  | -0.4111598 | Energy = -1256.395105824 |            |            |            | F                        | 5.2878239  | -1.8738699 | 0.1782805  |
| H                        | 3.6184866  | 2.6909178  | -0.3587844 | C                        | -0.7139476 | 0.8001715  | -0.1570314 | N                        | -2.0236144 | 1.0673489  | -0.1891920 |
| C                        | -4.9061794 | -1.5058723 | -3.4963551 | C                        | -0.4323743 | -0.5873453 | -0.0583286 | C                        | -2.5103463 | 2.4394066  | -0.2504021 |
| H                        | -4.1040195 | -2.2578783 | -3.4348784 | C                        | 0.9101853  | -0.9754288 | -0.0153222 | C                        | -2.5133936 | 3.1660167  | 1.1019767  |
| H                        | -4.9163149 | -1.0575834 | -4.5014548 | C                        | 1.9954293  | -0.0790713 | -0.0596783 | C                        | -1.4238803 | -1.7288518 | 0.0893450  |
| H                        | -5.8706772 | -1.9954140 | -3.3214051 | C                        | 1.7031343  | 1.2740697  | -0.1575198 | H                        | 1.2354808  | -2.0819587 | 0.1542121  |
| O                        | -4.7697890 | -0.4897949 | -2.4807818 | C                        | 0.3472050  | 1.7232024  | -0.2122388 | H                        | 0.1092042  | 2.7349510  | -0.3039921 |
| H                        | -3.9414521 | -0.0061310 | -2.6411723 | C                        | 3.4564215  | -0.4610980 | 0.0012632  | H                        | 5.4377850  | 0.4593312  | -0.0569933 |
| C                        | 7.3952974  | -0.2163412 | -1.3213454 | C                        | 4.3722736  | 0.5640667  | -0.0947304 | H                        | -2.7468108 | 0.3584409  | -0.0370428 |
| H                        | 7.6816723  | 0.8491096  | -1.3953855 | C                        | 4.0468672  | 1.9531329  | -0.2255185 | H                        | -3.5339121 | 2.3905192  | -0.6479913 |
| H                        | 6.8313064  | -0.4834146 | -2.2349531 | O                        | 2.6158774  | 2.2696498  | -0.2253440 | H                        | -1.9159131 | 3.0018175  | -0.9881445 |
| H                        | 8.3174635  | -0.8134963 | -1.3071401 | O                        | 4.7993426  | 2.9106184  | -0.3273159 | H                        | -1.5030956 | 3.2207813  | 1.5297449  |
| O                        | 6.6796391  | -0.5079647 | -0.1253721 | C                        | 3.8621460  | -1.8602239 | 0.1652871  | H                        | -3.1584385 | 2.6399829  | 1.8194101  |
| H                        | 5.8752680  | 0.0597419  | -0.1065729 | F                        | 3.4002881  | -2.6917088 | -0.8602991 | H                        | -2.8901032 | 4.1933200  | 0.9851407  |
| C503-DMF/S0              |            |            |            | F                        | 3.3389380  | -2.4526688 | 1.3169950  | H                        | -2.0487604 | -1.7394178 | -0.8188312 |

|                          |            |            |            |                          |            |            |            |                          |            |            |            |
|--------------------------|------------|------------|------------|--------------------------|------------|------------|------------|--------------------------|------------|------------|------------|
| H                        | -2.1087706 | -1.5639240 | 0.9364345  | C                        | 1.2037592  | -1.4894352 | 0.1155811  | C                        | 2.0050310  | -1.8887742 | -0.4680097 |
| H                        | -0.9787207 | -2.7254994 | 0.2034229  | C                        | 0.9815570  | -0.0929211 | 0.1684928  | C                        | 3.0349084  | -0.9856509 | -0.5385306 |
| C                        | -7.2123008 | -0.2017387 | 0.8737167  | C                        | -0.2860444 | 0.4544345  | 0.3138853  | C                        | 2.7890342  | 0.4247858  | -0.3937548 |
| H                        | -7.1093093 | 0.8291342  | 1.2306555  | C                        | 2.5642952  | -1.9229275 | -0.0374990 | O                        | 1.4806641  | 0.8263675  | -0.1663004 |
| H                        | -8.2084516 | -0.3514333 | 0.4371876  | C                        | 3.5911887  | -1.0218899 | -0.1236807 | O                        | 3.6347693  | 1.3219834  | -0.4490195 |
| H                        | -7.0206234 | -0.9075533 | 1.6912038  | C                        | 3.3376534  | 0.3962570  | -0.0642280 | C                        | 2.3157279  | -3.3673120 | -0.6330327 |
| C                        | -6.2529289 | -2.2291035 | -0.7368144 | O                        | 2.0207189  | 0.8038226  | 0.0875707  | F                        | 1.6513373  | -3.8989776 | -1.7023236 |
| H                        | -7.2613276 | -2.3497219 | -1.1538763 | O                        | 4.1837981  | 1.2897104  | -0.1329846 | F                        | 1.9332555  | -4.0823925 | 0.4674143  |
| H                        | -5.5038837 | -2.5631444 | -1.4634586 | C                        | 2.8838339  | -3.4075635 | -0.1071120 | F                        | 3.6331252  | -3.6068492 | -0.8237202 |
| H                        | -6.1392512 | -2.7775697 | 0.2063684  | F                        | 2.2493025  | -4.0015762 | -1.1604671 | N                        | -3.2041775 | 0.1373294  | 0.3567946  |
| O                        | -4.5655497 | -0.3695411 | 0.3076609  | F                        | 2.4735229  | -4.0555252 | 1.0235212  | C                        | -3.5164452 | 1.5516197  | 0.5419480  |
| S                        | -5.9225451 | -0.4366666 | -0.4287181 | F                        | 4.2061454  | -3.6504805 | -0.2484879 | C                        | -3.2817205 | 2.0569489  | 1.9712986  |
| C503-DMSO/S1             |            |            |            | N                        | -2.6918903 | 0.1302989  | 0.4723078  | C                        | -2.9466493 | -2.7200468 | 0.1487105  |
| Energy = -1561.096940516 |            |            |            | C                        | -2.9667234 | 1.5203088  | 0.8702908  | H                        | -0.3762230 | -3.3701422 | -0.2596377 |
| C                        | -0.7420675 | 0.8120678  | -0.1580578 | C                        | -2.6825269 | 1.8202081  | 2.3459104  | H                        | -0.8966642 | 1.5528012  | 0.2160452  |
| C                        | -0.4509455 | -0.5774274 | -0.1684142 | C                        | -2.4091501 | -2.7354768 | 0.4441880  | H                        | 4.0696870  | -1.2783157 | -0.7157890 |
| C                        | 0.8936990  | -0.9591255 | -0.1309336 | H                        | 0.1802368  | -3.3989482 | 0.1777545  | H                        | -4.0082920 | -0.4912393 | 0.3206234  |
| C                        | 1.9710894  | -0.0542196 | -0.0831106 | H                        | -0.3721778 | 1.5386034  | 0.3509238  | H                        | -4.5745438 | 1.6730292  | 0.2723208  |
| C                        | 1.6694657  | 1.3005147  | -0.0842958 | H                        | 4.6323829  | -1.3197738 | -0.2481857 | H                        | -2.9358462 | 2.1523925  | -0.1772042 |
| C                        | 0.3119669  | 1.7437864  | -0.1261634 | H                        | -3.4345928 | -0.5138046 | 0.7746437  | H                        | -2.2340935 | 1.9306979  | 2.2765858  |
| C                        | 3.4339852  | -0.4293422 | -0.0154028 | H                        | -4.0297675 | 1.6916612  | 0.6532173  | H                        | -3.9125208 | 1.5097918  | 2.6857855  |
| C                        | 4.3426104  | 0.6018960  | -0.1051231 | H                        | -2.3945145 | 2.1965856  | 0.2177766  | H                        | -3.5287768 | 3.1263843  | 2.0419848  |
| C                        | 4.0058762  | 1.9937353  | -0.1752721 | H                        | -1.6300595 | 1.6367926  | 2.6016882  | H                        | -3.7143658 | -2.4993496 | -0.6104514 |
| O                        | 2.5783040  | 2.3034483  | -0.0902836 | H                        | -3.3102825 | 1.1941625  | 2.9954544  | H                        | -3.4392831 | -2.6422167 | 1.1321880  |
| O                        | 4.7518583  | 2.9565929  | -0.2763287 | H                        | -2.9067099 | 2.8736075  | 2.5680067  | H                        | -2.6321681 | -3.7625293 | 0.0139266  |
| C                        | 3.8473023  | -1.8283003 | 0.1289973  | H                        | -3.1212154 | -2.5682143 | -0.3796607 | C                        | 3.8121316  | 4.8926704  | -0.7927366 |
| F                        | 3.4255130  | -2.6424602 | -0.9297435 | H                        | -2.9682104 | -2.5970657 | 1.3840089  | H                        | 3.5051968  | 5.9465403  | -0.7372347 |
| F                        | 3.2946120  | -2.4492854 | 1.2491860  | H                        | -2.0850158 | -3.7826882 | 0.4021453  | H                        | 3.9547967  | 4.6362473  | -1.8598624 |
| F                        | 5.1943479  | -1.9879217 | 0.2171661  | C                        | 4.4521731  | 4.8726283  | -0.4566572 | H                        | 4.7903341  | 4.7975961  | -0.2835895 |
| N                        | -2.0613261 | 1.2609367  | -0.1885946 | H                        | 4.1557079  | 5.9302683  | -0.4242439 | O                        | 2.7916232  | 4.1202538  | -0.1709152 |
| C                        | -2.4845565 | 2.6454018  | -0.1479621 | H                        | 4.7192977  | 4.6264833  | -1.5020669 | H                        | 3.0571502  | 3.1770640  | -0.2250802 |
| C                        | -2.5382339 | 3.2314962  | 1.2780377  | H                        | 5.3593412  | 4.7557382  | 0.1664551  | C                        | -7.0031892 | -1.5594437 | 0.7131733  |
| C                        | -1.5517571 | -1.6044668 | -0.2174449 | O                        | 3.3520441  | 4.1092229  | 0.0259234  | H                        | -6.6517429 | -1.6033255 | 1.7504625  |
| H                        | 1.1160441  | -2.0268052 | -0.1401830 | H                        | 3.6118869  | 3.1637718  | 0.0018565  | H                        | -7.1405924 | -2.5887343 | 0.3433989  |
| H                        | 0.1411541  | 2.8185894  | -0.1397985 | C                        | -6.5245178 | -1.6518292 | 0.9442180  | H                        | -7.9710887 | -1.0327745 | 0.6931927  |
| H                        | 5.4133889  | 0.3988831  | -0.1025128 | H                        | -6.5467678 | -1.7402238 | 2.0379480  | O                        | -5.9979404 | -0.8503502 | -0.0328933 |
| H                        | -2.8298260 | 0.5766578  | -0.0998209 | H                        | -6.3739531 | -2.6580214 | 0.5155610  | H                        | -6.2888073 | -0.7898626 | -0.9582686 |
| H                        | -3.4903358 | 2.6756503  | -0.5898627 | H                        | -7.5040720 | -1.2688167 | 0.6097039  | C                        | 7.2751833  | 0.4419756  | -0.5606268 |
| H                        | -1.8223246 | 3.2524898  | -0.7834113 | O                        | -5.4624630 | -0.7553137 | 0.6088870  | H                        | 8.0523009  | -0.2867674 | -0.8277970 |
| H                        | -1.5470620 | 3.2095284  | 1.7505591  | H                        | -5.4037865 | -0.6650283 | -0.3736088 | H                        | 7.1903147  | 0.4639308  | 0.5417874  |
| H                        | -3.2364507 | 2.6587667  | 1.9023730  | C                        | -4.5812483 | 0.4411265  | -3.0636382 | H                        | 7.6095098  | 1.4387697  | -0.9024583 |
| H                        | -2.8825635 | 4.2749220  | 1.2353506  | H                        | -3.7098641 | 0.3625444  | -3.7335178 | O                        | 6.0692906  | 0.0273052  | -1.1977325 |
| H                        | -2.1804604 | -1.4972287 | -1.1177767 | H                        | -4.7485108 | 1.5019300  | -2.8121056 | H                        | 5.3551999  | 0.6571457  | -0.9538853 |
| H                        | -2.2236981 | -1.5389917 | 0.6552290  | H                        | -5.4632470 | 0.0636834  | -3.5949102 | C503-(Meth)3/S3          |            |            |            |
| H                        | -1.1274432 | -2.6163985 | -0.2307829 | O                        | -4.4167500 | -0.3732213 | -1.8931655 | Energy = -1355.116509710 |            |            |            |
| C                        | -6.9089447 | -0.5248205 | -1.2447024 | H                        | -3.6255510 | -0.0754544 | -1.3874927 | C                        | -1.9473157 | -0.3792426 | 0.1520519  |
| H                        | -6.4856178 | -0.2101335 | -2.2051853 | C                        | 7.8911170  | 0.4329265  | -0.3840127 | C                        | -1.7882175 | -1.7864197 | 0.0445145  |
| H                        | -7.6116501 | -1.3542557 | -1.3979260 | H                        | 8.6336354  | -0.3411772 | -0.6194584 | C                        | -0.4969038 | -2.2811832 | -0.1588887 |
| H                        | -7.3902332 | 0.3231979  | -0.7423968 | H                        | 7.9670628  | 0.6646196  | 0.6944570  | C                        | 0.6524496  | -1.4717467 | -0.2567116 |
| C                        | -6.4533576 | -1.4369803 | 1.3258897  | H                        | 8.1533102  | 1.3427387  | -0.9545148 | C                        | 0.4735417  | -0.1041911 | -0.1332263 |
| H                        | -7.1645899 | -2.2528138 | 1.1423137  | O                        | 6.6123534  | -0.0833722 | -0.7462058 | C                        | -0.8201308 | 0.4585184  | 0.0694436  |
| H                        | -5.7254042 | -1.7382040 | 2.0874468  | H                        | 5.9290560  | 0.5919390  | -0.5419349 | C                        | 2.0647873  | -1.9580644 | -0.4871759 |
| H                        | -6.9655877 | -0.5159961 | 1.6298426  | C503-(Meth)3/S0          |            |            | C          | 3.0520385                | -1.0028420 | -0.5444176 |            |
| O                        | -4.6473457 | 0.1601590  | 0.0857009  | Energy = -1355.127791449 |            |            | C          | 2.8096883                | 0.3999167  | -0.4046140 |            |
| S                        | -5.4919604 | -1.1038457 | -0.2135808 | C                        | -1.9495044 | -0.3686524 | 0.1786898  | O                        | 1.4666547  | 0.8202010  | -0.1919488 |
| C503-(Meth)4/S0          |            |            |            | C                        | -1.7654995 | -1.7916911 | 0.0475889  | O                        | 3.6468334  | 1.3214802  | -0.4401073 |
| Energy = -1470.915002970 |            |            |            | C                        | -0.4941474 | -2.2913295 | -0.1614944 | C                        | 2.3505308  | -3.3955223 | -0.6282444 |
| C                        | -1.4087711 | -0.3871623 | 0.4013211  | C                        | 0.6554253  | -1.4630258 | -0.2459486 | F                        | 1.6579021  | -3.9803233 | -1.6843234 |
| C                        | -1.2238750 | -1.8104162 | 0.3537656  | C                        | 0.4389096  | -0.0698701 | -0.1018152 | F                        | 1.9474294  | -4.1334584 | 0.4822463  |
| C                        | 0.0566949  | -2.3169564 | 0.2115904  | C                        | -0.8184315 | 0.4724194  | 0.1140512  | F                        | 3.6631959  | -3.6654210 | -0.8225616 |

|   |            |            |            |
|---|------------|------------|------------|
| N | -3.2126452 | 0.1850375  | 0.3121807  |
| C | -3.4898718 | 1.5853497  | 0.5697827  |
| C | -3.2560401 | 2.0040644  | 2.0353959  |
| C | -2.9682323 | -2.7169910 | 0.1507862  |
| H | -0.3768224 | -3.3616951 | -0.2423783 |
| H | -0.8855953 | 1.5432633  | 0.1307514  |
| H | 4.0974014  | -1.2685661 | -0.7185253 |
| H | -4.0384772 | -0.4249379 | 0.2540923  |
| H | -4.5426214 | 1.7464015  | 0.3020682  |
| H | -2.8785632 | 2.2135961  | -0.0979625 |
| H | -2.2122073 | 1.8377058  | 2.3319507  |
| H | -3.9067258 | 1.4349618  | 2.7123491  |
| H | -3.4834726 | 3.0733397  | 2.1506488  |
| H | -3.7185607 | -2.5390855 | -0.6376625 |
| H | -3.4876689 | -2.6197432 | 1.1191352  |
| H | -2.6382948 | -3.7592533 | 0.0587731  |
| C | 3.7355587  | 4.8363510  | -0.7885335 |
| H | 3.4221455  | 5.8884141  | -0.7267238 |
| H | 3.8536358  | 4.5786901  | -1.8584929 |
| H | 4.7277990  | 4.7498236  | -0.3056193 |
| O | 2.7396099  | 4.0548322  | -0.1395069 |
| H | 3.0229829  | 3.1140720  | -0.1932051 |
| C | -6.8797005 | -1.5081568 | 0.7623751  |
| H | -6.5389648 | -1.4304446 | 1.8010051  |
| H | -6.8923000 | -2.5706749 | 0.4714188  |
| H | -7.8990847 | -1.0966236 | 0.6946440  |
| O | -5.9521951 | -0.7457440 | -0.0356357 |
| H | -6.2407447 | -0.7879938 | -0.9630895 |
| C | 7.2254781  | 0.4557543  | -0.5111075 |
| H | 8.0159214  | -0.2608444 | -0.7744236 |
| H | 7.0559113  | 0.3916213  | 0.5799149  |
| H | 7.5957346  | 1.4722826  | -0.7429434 |
| O | 6.0709077  | 0.1121288  | -1.2705015 |
| H | 5.3300966  | 0.7005906  | -0.9956650 |
